# Supplementary material for: Completion of neural crest cell production and emigration is regulated by retinoic-acid-dependent inhibition of BMP signaling
Source: eLife. 2022 Apr 8;11:e72723. doi: 10.7554/eLife.72723 (PMC8993216; doi:10.7554/eLife.72723)
Supplement: Figure 2—figure supplement 1—source data 1. [file elife-72723-fig2-figsupp1-data1.xlsx]

## Sheet: גיליון1
	RAW DATA - Figure 2 - figure supplement 1D
	control			RFP/GFP		cyp26			RFP/GFP		RARa403			RFP/GFP
		Area	RawIntDen				Area	RawIntDen				Area	RawIntDen
GFP	1	659933	56584881			1	852261	52445055			1	518339	13549765
RFP	2	659933	10519775	0.185911		2	852261	824198	0.0157155		2	518339	309314	0.022828
GFP	3	780856	64550398			3	833168	49036519			3	648244	28853776
RFP	4	780856	10214121	0.158235		4	833168	1891632	0.038576		4	648244	536456	0.0185922
GFP	5	882978	91553698			5	696968	45920543			5	548653	13214005
RFP	6	882978	14278206	0.155954		6	696968	1307092	0.0284642		6	548653	327624	0.0247937
GFP	7	661749	46205797			7	473724	18386821			7	824724	47594203
RFP	8	661749	6091435	0.131833		8	473724	1242456	0.0675732		8	824724	634969	0.0133413
GFP	9	816915	63742949			9	661680	46985209			9	557819	31974971
RFP	10	816915	10829906	0.1699		10	661680	979919	0.0208559		10	557819	451004	0.0141049
GFP	11	1013077	112437880			11	580600	38254671			11	501294	17394197
RFP	12	1013077	22143762	0.196942		12	580600	826491	0.021605		12	501294	329836	0.0189624
GFP	13	630514	22273924			13	479503	30894562
RFP	14	630514	1227843	0.0551247		14	479503	1036696	0.0335559
		Figure 2 - figure supplement 1D
		ratio				normalized to control mean
	RFP/GFP in whole embryos	control	Cyp26	RARa403		control	Cyp26	RARa403
		0.185911	0.0157155	0.022828		1.23482	0.104382	0.151624
		0.158235	0.038576	0.0185922		1.051	0.256222	0.12349
		0.155954	0.0284642	0.0247937		1.03585	0.189059	0.16468
		0.131833	0.0675732	0.0133413		0.875633	0.448821	0.088613
		0.1699	0.0208559	0.0141049		1.12847	0.138525	0.0936848
		0.196942	0.021605	0.0189624		1.30809	0.1435	0.125948
		0.0551247	0.0335559			0.366138	0.222879
control average		0.150557
