# Supplementary material for: Completion of neural crest cell production and emigration is regulated by retinoic-acid-dependent inhibition of BMP signaling
Source: eLife. 2022 Apr 8;11:e72723. doi: 10.7554/eLife.72723 (PMC8993216; doi:10.7554/eLife.72723)
Supplement: Figure 2—figure supplement 2—source data 1. [file elife-72723-fig2-figsupp2-data1.xlsx]

## Sheet: גיליון1
	TF-d2EGFP/co-RFP intensity in RP	NC	control	RARa403
		0.281944	0.0349369	0.09911
		0.497806	0.0838952	0.498367
		0.400704	0.0958999	0.373202
		0.526447	0.100644	0.307205
		0.719622	0.0701753	0.169062
		0.707091	0.108794	0.124462
		0.864938	0.0999326	0.311174
		0.622569	0.12313	0.270709
		0.470069	0.0635751
		0.565688	0.0867759	0.269161

## Sheet: Raw Data
	NC
	intensity	TF-d2EGFP/RFP		intensity	TF-d2EGFP/RFP		intensity	TF-d2EGFP/RFP		intensity	TF-d2EGFP/RFP		intensity	TF-d2EGFP/RFP		intensity	TF-d2EGFP/RFP		intensity	TF-d2EGFP/RFP		intensity	TF-d2EGFP/RFP		intensity	TF-d2EGFP/RFP
RFP	2432.93			2003.91			2648.89			1918.5			1289.75			2623.27			2566.02			3067.19			2663.39
TF-d2EGFP	538.01	0.221137		533.93	0.266444		1218.29	0.459925		728.76	0.379859		644.77	0.499919		2139.06	0.815417		2131.3	0.830586		1787.89	0.582908		500.55	0.187937
RFP	1851.13			1999.54			1171.16			3184.26			1681.06			2379.71			3309.24			2502.58			3104.83
TF-d2EGFP	656.4	0.354594		863	0.431599		545.45	0.465735		1756.46	0.551607		1002.37	0.596273		1932.8	0.8122		3026.81	0.914654		1518.32	0.606702		1873.91	0.603547
RFP	2462.68			1989.43			1485.23			2438.89			1471.52			2755.44			3275.59			3142.24			3026.52
TF-d2EGFP	857.72	0.348287		1399.89	0.703664		815.47	0.549053		1782.44	0.730841		1231.42	0.836835		2641.22	0.958547		3472.94	1.06025		1948.75	0.620179		1848.05	0.610619
RFP	2408.3			2118.12			1917.33			2148.79			1400.74			2939.92			3184.3			2959.11			2153.15
TF-d2EGFP	1215.54	0.504729		1972.53	0.931265		734.99	0.38334		1087.65	0.506169		1069.99	0.763875		2539.04	0.863643		2578.73	0.809826		2344.09	0.79216		997.99	0.463502
RFP	2569.44			2635.28			1987.03			2823.21			1895.34			2596.02			3104.97			3050.25			1894.62
TF-d2EGFP	680.92	0.265007		2084.64	0.791051		680.13	0.342285		1750.87	0.62017		1354	0.714384		1853.34	0.713916		2663.34	0.857767		2530.55	0.829621		731.33	0.386004
RFP	2928.43			1524.06			1998			2200.77			1998.42			3096.66			2261.45			3637.68			2741.64
TF-d2EGFP	792.24	0.270534		928.81	0.609431		730.38	0.365556		963.29	0.437706		1136.73	0.568814		1334.1	0.430819		2133.6	0.943465		2424.73	0.666559		885.94	0.323142
RFP	2991.45			1487.44			1629.04			1079.72			1877.17			3107.21			1690.63			3504.51			2495.23
TF-d2EGFP	706.64	0.23622		469.9	0.315912		497.42	0.305345		666.81	0.617577		1450.09	0.772487		2047.88	0.659074		1640.28	0.970218		1943.56	0.554588		1116.37	0.447402
RFP	2661			2439.16			2374.23			2709.75			1157.44			3222.94			1403.68			2863.86			2472.91
TF-d2EGFP	391.17	0.147001		884.78	0.36274		932.61	0.392805		993.02	0.366462		897.32	0.775263		2262.04	0.701856		850.82	0.606135		987.98	0.344982		963.19	0.389497
RFP	1836.2			1144.6			2424.99			3216.86			1381.85			2045.73			1862.39			1723.6			2814.91
TF-d2EGFP	456.15	0.248421		488.74	0.426996		623.13	0.256962		1614.71	0.501952		1346.4	0.974346		1094.98	0.535251		890.88	0.478353		1028.68	0.596821		1724.79	0.612734
RFP	2205.24			987.72			1588.37			3036.49			1394.44			2129.43			654.69			2353.99			1582.8
TF-d2EGFP	492.89	0.223509		137.25	0.138956		772.01	0.486039		1676.52	0.552124		967.77	0.694021		1235.46	0.580183		771.31	1.17813		1485.77	0.631171		1070.46	0.676308
		0.281944			0.497806			0.400704			0.526447			0.719622			0.707091			0.864938			0.622569			0.470069
	control
	intensity	TF-d2EGFP/RFP		intensity	TF-d2EGFP/RFP		intensity	TF-d2EGFP/RFP		intensity	TF-d2EGFP/RFP		intensity	TF-d2EGFP/RFP		intensity	TF-d2EGFP/RFP		intensity	TF-d2EGFP/RFP		intensity	TF-d2EGFP/RFP		intensity	TF-d2EGFP/RFP
RFP	1863.31			1379.55			2104.25			1582.94			1141.11			2405.09			1591.24			2636.86			2017.48
TF-d2EGFP	103.11	0.055337		136.57	0.098996		256.42	0.121858		148.86	0.0940402		119.71	0.104907		128.73	0.053524		163.61	0.102819		326.1	0.12367		282.12	0.139838
RFP	2780.25			1788.52			2563.65			1974.05			1059.82			2467.81			1660.95			1531.83			1612.71
TF-d2EGFP	137.49	0.0494524		117.17	0.0655123		126.9	0.0494997		214.81	0.108817		57.1	0.0538771		348.62	0.141267		175.54	0.105687		294.75	0.192417		76.05	0.0471566
RFP	2450.89			2087.81			3092.9			1565.03			1833.03			1660.28			1699.2			2099.85			1673.45
TF-d2EGFP	81.01	0.0330533		219.71	0.105235		224.74	0.0726632		147.26	0.094094		97.92	0.0534197		317.19	0.191046		139.29	0.0819739		219.1	0.104341		225.57	0.134793
RFP	2153.91			2594.88			2244.38			2809.95			2468.47			3107.27			1841.3			1766.8			1840.93
TF-d2EGFP	67.48	0.0313291		233.66	0.0900466		276.23	0.123076		194.09	0.0690724		105.17	0.0426053		278.78	0.0897186		129.47	0.0703145		170.84	0.0966946		40.57	0.0220378
RFP	2635.7			2200.5			2760.93			783.74			1504.94			2475.84			1795.18			2276.74			1877.26
TF-d2EGFP	92.71	0.0351747		191.32	0.0869439		346.7	0.125574		95.28	0.121571		155.25	0.10316		244.71	0.0988392		182.95	0.101912		268.76	0.118046		62.36	0.0332186
RFP	1968.98			1737.8			2618.02			1829.39			2016.42			3431.16			964.22			2249.62			1479.79
TF-d2EGFP	65.95	0.0334945		54.94	0.0316147		253.87	0.0969702		161.2	0.0881168		183.67	0.0910872		344.8	0.100491		117.15	0.121497		235.19	0.104547		95.28	0.0643875
RFP	2033.52			2664.2			2485.18			1616.54			1931.72			3040.45			1565.85			1964.61			2573.47
TF-d2EGFP	32.23	0.0158494		266.7	0.100105		283.02	0.113883		93.52	0.057852		120.61	0.0624366		205.28	0.0675163		233.66	0.149222		206.73	0.105227		89.8	0.0348945
RFP	1991.86			2804.47			2069.26			922.02			1911.63			2587.79			2176.02			2210.64			2163.87
TF-d2EGFP	70.67	0.0354794		223.59	0.0797263		144.74	0.0699477		166.71	0.18081		214.25	0.112077		438.6	0.169488		154.62	0.0710563		204.12	0.0923353		141.28	0.0652904
RFP	1966.69			2177.5			2506.54			1917.69			2252.56			2480.92			1536.16			3437.12			2043.64
TF-d2EGFP	60.37	0.0306962		110.94	0.0509483		253.42	0.101104		184.9	0.0964181		60.59	0.0268983		258.76	0.1043		131.96	0.0859025		452.05	0.13152		104.11	0.0509434
RFP	1627.96			2037.99			2613.36			1559.52			2201.23			2002.66			1181.82			2321.64			2307.91
TF-d2EGFP	48.03	0.0295032		264.58	0.129824		220.63	0.0844239		149.16	0.0956448		112.89	0.051285		143.7	0.0717546		128.75	0.108942		377.27	0.162502		99.68	0.0431906
		0.0349369			0.0838952			0.0958999			0.100644			0.0701753			0.108794			0.0999326			0.12313			0.0635751
	RARa403
	intensity	TF-d2EGFP/RFP		intensity	TF-d2EGFP/RFP		intensity	TF-d2EGFP/RFP		intensity	TF-d2EGFP/RFP		intensity	TF-d2EGFP/RFP		intensity	TF-d2EGFP/RFP		intensity	TF-d2EGFP/RFP		intensity	TF-d2EGFP/RFP		intensity	TF-d2EGFP/RFP
RFP	2178.86			1377.49			985.7			2171.12			2422.9			1574.89			1363.25			2056.74
TF-d2EGFP	144.04	0.066108		534.29	0.387872		483.79	0.490809		668.12	0.307731		391.47	0.161571		264.62	0.168024		304.62	0.223451		284.59	0.138369
RFP	2828.7			791.7			1173.57			1657.6			1698.9			1090.53			1419.62			2530.42
TF-d2EGFP	176.9	0.0625376		583.4	0.736895		462.49	0.394088		719.41	0.434007		271.65	0.159898		175.02	0.160491		313.27	0.220672		1088.94	0.43034
RFP	2617.9			1485.52			916.49			2074.44			982.89			2299.05			2311.12			2073.46
TF-d2EGFP	198.3	0.0757477		581.81	0.391654		328.23	0.358138		531.37	0.256151		241.82	0.24603		251.39	0.109345		697.12	0.301637		420.72	0.202907
RFP	1482.19			908.86			723.87			2475.98			2470.81			2410.59			2869.04			2525.06
TF-d2EGFP	135.31	0.0912906		433.57	0.477048		354.98	0.490392		860.66	0.347604		620.25	0.251031		323.46	0.134183		867.62	0.302408		382.37	0.15143
RFP	1712.72						751.74			1770.44			2729.5			1790.36			1986.78			2540.65
TF-d2EGFP	237.66	0.138762					337.47	0.448919		519.42	0.293385		519.28	0.190247		216.69	0.121032		663.65	0.334033		843.06	0.331828
RFP	1497.06						1523.34			1534.83			1598.45			2180.67			1217.45			2324.4
TF-d2EGFP	142.42	0.0951331					433.83	0.284789		265.09	0.172716		351.16	0.219688		198.02	0.090807		493.11	0.405035		749.82	0.322586
RFP	1074.67						1659.25			646.13			1126.75			1722.74			874.89			2413.7
TF-d2EGFP	108.14	0.100626					686.96	0.414018		309.06	0.478325		145.64	0.129257		114.1	0.0662317		463.85	0.530181		869.79	0.360355
RFP	1242.44						2064.62			744.88			2024.29			2069.39			1774.11			1789.27
TF-d2EGFP	245.08	0.197257					487.8	0.236266		228.27	0.306452		237.98	0.117562		285.82	0.138118		443.47	0.249968		450.53	0.251795
RFP	1613.43						1068.89			1781.42			1086.41			1079.57			2643.01			1653.29
TF-d2EGFP	143.17	0.0887364					350.62	0.328023		385.21	0.216238		160.69	0.147909		142.42	0.131923		616.29	0.233177		496.52	0.300322
RFP	1733.33						1245.78			912.96			1327.86									1605.18
TF-d2EGFP	129.83	0.0749021					357.02	0.286584		236.86	0.259442		89.53	0.0674243								348.57	0.217153
		0.09911			0.498367			0.373202			0.307205			0.169062			0.124462			0.311174			0.270709			#DIV/0!
