# Supplementary material for: Completion of neural crest cell production and emigration is regulated by retinoic-acid-dependent inhibition of BMP signaling
Source: eLife. 2022 Apr 8;11:e72723. doi: 10.7554/eLife.72723 (PMC8993216; doi:10.7554/eLife.72723)
Supplement: Figure 2—source data 1. [file elife-72723-fig2-data1.xlsx]

## Sheet: גיליון1
		Figure 2E
		A.U				normalized to control mean
	pSmad intensity in dorsal NT	control	Cyp26	RARa403		control	Cyp26	RARa403
		24.2559	42.5847	66.0593		0.91222	1.60153	2.48436
		34.1573	25.4541	49.5108		1.28459	0.957282	1.86201
		13.658	45.8641	37.0913		0.513653	1.72486	1.39493
		42.1322	58.7132	63.2504		1.58451	2.20809	2.37873
		43.5513	70.2165	63.6081		1.63788	2.64071	2.39218
		17.2879	35.8213	52.3343		0.650164	1.34717	1.96819
		17.1435	53.4628			0.644735	2.01063
		20.4944	26.1751			0.770754	0.984395
control average		26.5851
		Figure 2I
		A.U				normalized to control mean
	BAMBI intensity in dorsal NT	control	Cyp26	RARa403		control	Cyp26	RARa403
		44	22.8	8.27273		1.07843	0.558824	0.202763
		45.25	32.5882	9.91667		1.10907	0.798731	0.243056
		38.6667	9.92857	11.1429		0.947712	0.243347	0.273109
		47	22.2941	13.5556		1.15196	0.546424	0.332244
		45.1538	13.3636	12.8333		1.10671	0.32754	0.314542
		35.5	17.7619	11.1667		0.870098	0.435341	0.273693
		29.8947	25.3636			0.732714	0.621658
control average		40.7807
		Figure 2L
		A.U			normalized to control mean
	hairy1 intensity in dorsal NT	control	RARa403		control	RARa403
		41.2222	23.875		1.1521	0.667272
		36.9091	33.8571		1.03156	0.946259
		39.75	14.9091		1.11096	0.416688
		26.6	22		0.743432	0.614869
		27.375	24.7059		0.765092	0.690494
		36.8462	24.7857		1.0298	0.692725
		41.7692	17.0667		1.16739	0.476989
control average		35.7817
		Figure 2O
		A.U			normalized to control mean
	Grem1 intensity in dorsal NT	control	RARa403		control	RARa403
		27.0197	18.8179		1.06734	0.743349
		21.0712	24.6042		0.832359	0.971921
		28.1098	17.3321		1.1104	0.684657
		29.7712	20.2921		1.17603	0.801585
		26.6408	19.5049		1.05237	0.770488
		24.7384	18.6096		0.977222	0.735121
		22.1409	21.6779		0.874615	0.856325
		23.0276	23.8234		0.909641	0.941079
control average		25.3149

## Sheet: Raw Data 2E
control										cyp26										RARa403
	13.4877	15.6676	12.1935	29.0191	32.5613	14.1689	5.24523	21.1853			55.9946	25.8174	30.7902	51.3624	67.9837	52.5886	51.158	22.8202			52.7248	52.3842	32.4932	54.3252	75.1528	50.3408
	11.4441	18.8011	35.7629	41.6894	53.6785	5.79019	16.2807	16.9619			34.0599	35.1499	64.3052	-3.47411	87.1935	29.3597	53.2016	41.1444			56.4033	67.0981	34.5368	37.5302	61.9113	50.6047
	22.752	13.3515	21.3896	57.5613	55.7221	18.3243	15.7357	16.485			41.0082	22.139	33.9918	58.2425	66.6213	47.4796	49.3188	37.0572			82.4251	65.5313	36.7166	100	48.5729	73.5872
	32.4251	52.4523	26.3624	35.6267	31.9482	5.58583	22.6158	17.6431			29.4959	27.9292	38.2834	87.7384	80.4496	29.2234	67.7112	34.4687			72.6839	46.1853	57.1526	88.0382	36.2901	54.4351
	18.3924	36.7166	11.2398	30.5858	26.4986	10.218	26.0218	19.8229			48.9782	32.6294	46.4578	65.1907	60.0817	38.5559	65.1907	22.3433				28.3379	22.2071	43.8498	80.4961	15.2953
	11.1717	49.8638	3.61035	49.8638	37.1935	15.4632	16.9619	30.5858			32.0163	29.0872	56.9482	70.8447	87.2616	34.0599	78.6785	24.7956				37.7384	17.7793	55.7588	67.1665	77.9762
	6.33515	52.248	20.5722	63.3515	24.8638	12.2616		16.6894			56.5395	26.2262	20.7084	28.4741	90.327	19.4823	55.3815	24.7275				41.1444	41.8937		75.6674	44.1004
	15.3951		0	25.1362	54.2234	21.049		17.6431				23.0926	74.5232	70.5041	52.248		48.9101	20.3678				47.2071	36.5123
	50.8856		14.5777	63.3515	75.2725	39.9864		12.4659				10.8992	34.7411	58.9237	39.782		56.6757	24.7275				46.2534	54.4959
	30.109		2.65668	25.1362		6.81199		19.1417				38.3515	71.3896	58.0381			37.8747	19.2779				60.5586	37.1253
	33.0381		11.0354			16.4169		24.5913				18.9373	63.624	100			34.5368	15.8719				52.1798
	33.8556		4.49591			21.5259		18.4605				25	30.7902				42.9155	26.4986
	36.0354					31.4714		22.4114				22.0027	63.7602
						22.9564		32.8338				19.9591	11.7847
												38.079
												27.4523
												19.0736
												19.6185
												10.218
												31.0627
												31.812
	24.2559	34.1573	13.658	42.1322	43.5513	17.2879	17.1435	20.4944			42.5847	25.4541	45.8641	58.7132	70.2165	35.8213	53.4628	26.1751			66.0593	49.5108	37.0913	63.2504	63.6081	52.3343

## Sheet: Raw Data 2I
control								Cyp26								RARa403
41	55	38	50	55	28	22		9	27	12	46	7	11	27		11	7	11	5	23	9
54	46	42	47	50	36	20		16	27	20	35	7	9	30		11	5	8	6	8	11
50	57	42	50	59	41	23		23	38	12	27	11	11	26		7	4	6	8	25	11
44	46	46	46	52	37	24		19	10	20	20	10	9	20		6	13	15	13	11	9
53	45	37	47	33	27	30		20	26	5	22	13	6	19		9	10	18	11	6	18
53	37	40	47	41	44	35		25	23	9	25	16	12	20		11	7	9	23	4	9
37	37	35	41	39		32		28	12	2	7	11	2	16		10	13	11	18	4
39	39	40	51	55		30		30	27	7	23	22	4	32		6	6		19	12
25		33	44	50		28		31	41	9	30	14	19	27		7	8		19	9
		32		34		23		27	36	7	16	18	34	30		8	8			18
		43		33		25			44	8	20	18	14	32		5	15			13
		42		35		32			39	13	8		26				23			21
		35		51		30			32	3	15		26
		42				39			33	12	20		27
		40				40			45		19		22			8.27273	9.91667	11.1429	13.5556	12.8333	11.1667
		27				36			47		20		21
		33				33			47		26		18
		49				31							24
						35							32
													35
44	45.25	38.6667	47	45.1538	35.5	29.8947							11
								22.8	32.5882	9.92857	22.2941	13.3636	17.7619	25.3636

## Sheet: Raw Data 2L
control
44	32	41	26	28	34	42
46	27	38	29	28	34	46
38	30	37	30	27	42	37
32	37	41	26	29	62	54
38	38	38	36	30	41	43
55	36	38	21	26	32	44
53	39	42	22	26	35	42
37	54	43	21	25	30	38
43	36		22		33	39
38	36		33		30	33
39	41				39	37
32					36	48
39					31	40
35
44
44
41
44
41.2222	36.9091	39.75	26.6	27.375	36.8462	41.7692
RARa403
18	24	18	25	32	26	16
18	45	17	28	23	28	20
24	34	14	23	20	30	24
26	36	8	20	31	25	14
19	32	8	14	21	19	17
23	30	12	27	22	19	16
24	36	22	27	21	23	15
39		16	25	27	21	20
		16	25	24	32	18
		15	14	33	27	16
		18	14	18	21	16
			22	26	30	12
				28	19	16
				33	27	20
				15		16
				26
				20
23.875	33.8571	14.9091	22	24.7059	24.7857	17.0667

## Sheet: Raw Data 2O
control
	25.065	22.798	24.297	31.057	32.524	27.05	26.491	26.518
	27.316	24.505	27.138	28.578	22.582	23.824	18.886	25.29
	22.41	18.057	23.806	31.733	27.12	22.515	21.822	28.862
	23.102	25.59	31.449	33.517	25.759	25.067	19.122	20.485
	24.057	20.356	29.793	28.638	18.329	22.365	20.745	26.711
	30.192	21.031	31.585	30.142	20.815	23.981	25.017	21.05
	27.405	16.072	24.084	30.489	27.017	23.061	19.275	22.825
	33.464	19.99	21.594	30.342	26.116	23.273	19.728	24.159
	25.766	23.149	23.953	22.168	26.945	22.645	19.707	19.283
	29.779	18.019	20.9	20.696	22.512	19.954	22.963	24.393
	28.661	23.545	28.546	25.102	26.85	29.737	28.888	26.651
		21.154	19.258	29.956	21.799	29.493	26.96	20.126
		16.85	22.836	28.552	38.129	20.588	22.305	24.596
		20.038	25.015	25.935	33.149	28.57	19.916	22.11
		20.078	27.064	26.403	27.294	19.535	20.288	20.248
		22.56	28.916	30.73	29.121	25.312		24.509
		19.688	26.388	32.293	23.012	33.125		22.479
		25.801	37.149	43.539	30.442	26.302		19.886
			37.133	20.015	28.189	30.114		25.062
			32.755	28.115	27.338	21.28		15.308
			33.272	36.714	24.415	21.715
			31.931	32.054
			41.224	30.732
			24.549	33.201
				29.871
				33.48
	27.0197	21.0712	28.1098	29.7712	26.6408	24.7384	22.1409	23.0276
dnRAR
	20.102	32.76	17.375	13.82	39.535	22.065	20.157	23.679
	28.684	29.626	16.994	32.415	16.004	13.783	15.273	32.482
	26.416	39.838	15.361	16.556	17.263	19.187	19.786	32.176
	23.147	27.734	22.986	24.033	22.077	23.964	26.122	23.33
	19.368	24.91	22.502	24.516	19.845	19.207	18.331	23.098
	19.633	21.748	16.067	16.023	20.203	20.475	21.203	23.485
	15.855	23.376	11.481	19.571	12.576	20.743	24.317	22.162
	20.11	18.895	16.103	16.004	15.132	18.731	21.208	25.128
	11.851	22.23	23.894	12.572	16.93	16.952	29.171	28.375
	19.826	23.794	16.669	24.994	13.85	16.024	20.782	22.412
	16.298	22.982	19.914	20.949	21.139	18.981	21.122	25.474
	18.877	27.365	25.639	21.167		13.203	25.117	26.38
	16.02	22.633	10.568	18.128			22.644	23.269
	20.287	23.357	11.697	30.721			24.014	22.76
	18.841	20.639	20.855	16.014			20.861	17.683
	17.782	19.806	16.674	16.321			16.738	24.438
	16.011	16.578	13.953	21.162				20.848
	17.897		13.888					27.537
	17.26		13.228					16.512
	15.539		16.1					18.669
	13.846		24.498					19.911
	20.437		21.276					24.307
	18.724		14.447
			18.613
			12.52
	18.8179	24.6042	17.3321	20.2921	19.5049	18.6096	21.6779	23.8234
