# Supplementary material for: Completion of neural crest cell production and emigration is regulated by retinoic-acid-dependent inhibition of BMP signaling
Source: eLife. 2022 Apr 8;11:e72723. doi: 10.7554/eLife.72723 (PMC8993216; doi:10.7554/eLife.72723)
Supplement: Figure 3—source data 1. [file elife-72723-fig3-data1.xlsx]

## Sheet: גיליון1
		Figure 3J
		A.U				normalized to control mean
	Sox9 intensity in RP	control	RARa403	Cyp26		control	Cyp26	RARa403
		11.143	16.0923	6.95647		1.74237	2.51627	1.08775
		9.11255	16.4955	12.4002		1.42488	2.57931	1.93896
		7.23076	20.7292	15.3594		1.13064	3.24131	2.40167
		7.36075	15.1649	3.79832		1.15096	2.37126	0.593923
		4.0268	23.5191	7.95788		0.629649	3.67756	1.24433
		4.82297	14.1972	19.7154		0.754142	2.21994	3.0828
		7.875	20.3243	17.7701		1.23137	3.178	2.77863
		3.32563	10.0609			0.520012	1.57317
		4.11904	20.3263			0.644073	3.17832
		4.93681	12.3713			0.771944	1.93443
			20.917				3.27068
control average		6.39533

## Sheet: Raw Data 3J
	control
	1.1991	9.38222	8.9337	8.33021	6.50928	5.47528	18.3803	2.07694	4.27801	7.66277
	12.0913	10.0467	7.32287	8.68828	4.95019	3.76559	10.3675	3.60821	7.0254	3.85168
	11.3888	10.8174	7.23334	5.5691	4.26707	6.4627	6.77775	3.13604	5.49099	6.82244
	12.6869	8.25886	6.06371	3.07697	3.76927	6.32092	9.44834	5.0234	4.68986	1.71262
	12.0836	8.58898	8.14281	6.71679	3.77768e-07	7.25896	8.6488	3.65136	3.44286	3.67902
	10.6481	7.40747	6.68516	6.40125	4.76108	5.80949	4.32426	2.79484	3.18326	6.38879
	11.1379	10.9166	6.23944	8.81151	4.63079	3.36775	5.55607	3.73237	4.07561	5.46558
	17.3674	6.49048	7.75408	8.02657	3.68551	3.3678	5.83467	3.46189	2.01451	5.12235
	12.5522	6.99422	9.69278	8.50966	1.86146	3.78019	7.92012	1.47765	3.85552	5.72526
	11.1732	9.87056	5.6797	9.70971	3.72284	4.05581	9.11197	3.18782	5.56452	3.74088
	11.7297	8.93637	7.34504	9.09311	5.42116	3.81893	5.69055	3.87473	5.43146	5.47424
	10.4673	11.8048	9.94374	6.52607	4.63268	1.3808	4.72349	4.03466	2.74711	3.27624
	9.80596	8.43243	5.48086	7.1959	3.24252	5.81163	7.71389	3.34161	4.38468	5.64508
	9.77916	10.3788	7.04336	6.7722	4.85319	5.64075	6.17013	3.12092	3.26488	2.52318
	13.0344	8.36233	4.90088	6.98385	4.09491	6.02789	7.45712	3.36203	2.33696	6.96203
average	11.143	9.11255	7.23076	7.36075	4.0268	4.82297	7.875	3.32563	4.11904	4.93681
	RARa403
	20.2279	15.0976	17.1241	13.9161	23.6797	14.9993	22.2755	9.6231	20.1868	14.5615	28.3856
	13.7806	23.2023	16.6248	10.2415	24.3909	12.6915	23.6814	8.95089	23.2211	7.38226	24.0739
	19.9542	11.3834	17.9018	18.9102	24.9153	11.1228	23.8733	9.88768	24.7933	9.99587	22.498
	19.2123	17.9597	25.2342	12.3629	19.2279	12.5929	22.0052	8.98249	23.8514	13.1718	20.942
	9.99826	18.2847	24.186	19.8212	25.5368	9.83246	21.4988	8.76836	21.8349	15.8233	19.2252
	14.8345	19.291	19.6857	16.2909	26.9222	11.33	22.8379	7.62647	23.1011	18.1165	21.1523
	11.685	14.3971	23.6922	16.5077	28.843	15.2547	17.9412	13.3124	22.44	11.1957	19.3519
	22.9072	16.6562	24.1469	13.068	25.6411	14.1919	16.7154	7.2432	18.0918	8.82611	21.255
	22.0766	11.9573	24.013	9.30709	24.7105	16.5234	15.6535	4.16822	22.3752	12.8801	21.1471
	23.6631	15.8514	24.2433	10.2948	21.202	13.2618	18.6274	8.71629	24.2922	8.48184	22.7981
	11.1361	16.0819	19.4878	13.7294	25.2508	16.5596	23.5346	7.05408	17.373	12.8887	21.2893
	15.0038	16.7073	16.18	14.3526	22.0763	12.0125	16.1224	11.1598	15.1707	11.1212	17.7877
	14.005	17.2419	17.9005	15.246	23.933	15.0889	20.2722	15.7911	15.2479	11.9646	12.9869
	14.3357	17.7651	19.5225	23.2673	19.5334	16.878	21.5072	10.4242	11.8826	13.9557	24.2912
	8.56427	15.5549	20.9947	20.1576	16.9238	20.6174	18.3176	19.2046	21.0324	15.2039	16.5706
average	16.0923	16.4955	20.7292	15.1649	23.5191	14.1972	20.3243	10.0609	20.3263	12.3713	20.917
	cyp26a1
	2.08467	7.84731	9.92567	-0.808228	4.36494	9.16871	8.44446
	1.00157	-0.73773	8.1249	3.4591	5.78799	16.9002	11.5183
	2.31324	13.0764	11.6671	1.83631	5.84561	12.4398	6.10883
	1.03193	7.05182	10.1965	5.16079	9.5059	17.2122	15.3123
	5.82983	9.80315	15.6053	0.27793	4.81462	15.6647	7.75247
	7.21298	8.87715	15.6383	1.13261	3.15965	11.4838	12.3619
	8.08444	13.5193	12.3817	1.80799	5.84191	15.9615	14.2106
	6.46913	7.39466	9.64481	4.62035	4.89224	13.2825	9.76386
	4.44305	8.39911	13.4327	4.53485	5.54345	17.4516	15.7397
	3.48291	8.367	13.4721	5.82191	7.60123	5.44219	17.49
	5.83828	8.92679	11.5143	-1.08359	4.67889	9.0321	13.6703
	5.10857	12.6208	7.25244	1.01207	3.46974	14.9303	9.78241
	7.40609	4.57005	7.33937		6.02494	19.046
	3.6387	9.99069	3.93988		4.44576	8.25758
		6.93227	6.91735		4.66488	11.9722
		8.44258	10.4702		5.37612	13.2163
average	4.75852	8.48227	10.5065	2.59821	5.44353	13.4862	12.1555
