# Supplementary material for: Completion of neural crest cell production and emigration is regulated by retinoic-acid-dependent inhibition of BMP signaling
Source: eLife. 2022 Apr 8;11:e72723. doi: 10.7554/eLife.72723 (PMC8993216; doi:10.7554/eLife.72723)
Supplement: Figure 4—source data 1. [file elife-72723-fig4-data1.xlsx]

## Sheet: גיליון1
	Figure 4D															Figure 4J
		total number of cells counted				/120 sections					Figure 4G					Laminin intensity	A.U			normalized to control mean
	pH3+ cells in dorsal NT	control	RARa403	Cyp26		control	Cyp26	RARa403			apically-localized/total nuclei	control	RARa403				control	RARa403		control	RARa403
		85	89	111		0.708333	0.741667	0.925				0.254665	0.357832				3564.75	2343.43		1.53646	1.01006
		81	151	127		0.675	1.25833	1.05833				0.21085	0.292704				2622.96	2076.13		1.13054	0.894844
		52	179	172		0.433333	1.49167	1.43333				0.212486	0.336041				1748.59	2325.45		0.753669	1.0023
		108	148	137		0.9	1.23333	1.14167				0.255986	0.37724				2378.11	1305.58		1.025	0.562726
		91	160	147		0.758333	1.33333	1.225				0.220159	0.33358				2961.73	819.841		1.27655	0.353365
		99	163	103		0.825	1.35833	0.858333				0.203648	0.311916				2133.67	1385.31		0.919645	0.597091
		74	144	138		0.616667	1.2	1.15				0.174014	0.3747				2197.07	1060.14		0.946971	0.456938
		108	191	136		0.9	1.59167	1.13333				0.219301	0.387094				1814.72	1259.16		0.782175	0.542716
		89	116	146		0.741667	0.966667	1.21667				0.2212	0.349882				1459	800.065		0.628853	0.344841
		97				0.808333						0.17344	0.325141
		92				0.766667							0.331072				control mean
		108				0.9							0.354922				2320.07
		132				1.1
		90				0.75
		119				0.991667
		126				1.05
		124				1.03333
		100				0.833333
		107				0.891667
		119				0.991667

## Sheet: 4G raw data
control
55.1			55.3			55.5			55.7			55.9			55.11			55.13			55.15			55.17			55.19
basal	apical	apical/total	basal	apical	apical/total	basal	apical	apical/total	basal	apical	apical/total	basal	apical		basal	apical	apical/total	basal	apical	apical/total	basal	apical	apical/total	basal	apical	apical/total	basal	apical	apical/total
38	13	0.254902	24	9	0.272727	24	6	0.2	25	8	0.242424	23	8	0.258065	26	5	0.16129	22	3	0.12	24	6	0.2	26	7	0.212121	23	6	0.206897
27	9	0.25	27	7	0.205882	24	7	0.225806	26	11	0.297297	28	6	0.176471	23	2	0.08	22	4	0.153846	26	8	0.235294	23	5	0.178571	25	8	0.242424
26	10	0.277778	23	5	0.178571	27	11	0.289474	32	12	0.272727	22	5	0.185185	25	8	0.242424	25	5	0.166667	25	4	0.137931	30	11	0.268293	19	7	0.269231
22	8	0.266667	21	8	0.275862	18	5	0.217391	30	15	0.333333	21	7	0.25	24	9	0.272727	27	7	0.205882	20	6	0.230769	35	9	0.204545	28	6	0.176471
19	9	0.321429	23	6	0.206897	22	7	0.241379	30	15	0.333333	21	6	0.222222	27	8	0.228571	21	4	0.16	23	8	0.258065	30	14	0.318182	23	4	0.148148
24	7	0.225806	23	5	0.178571	19	7	0.269231	31	9	0.225	20	6	0.230769	25	6	0.193548	18	5	0.217391	21	5	0.192308	29	5	0.147059	26	5	0.16129
16	8	0.333333	17	4	0.190476	15	6	0.285714	22	9	0.290323	25	5	0.166667	22	6	0.214286	21	4	0.16	19	7	0.269231	24	8	0.25	23	3	0.115385
21	6	0.222222	24	6	0.2	20	5	0.2	35	9	0.204545	23	10	0.30303	24	7	0.225806	20	5	0.2	22	9	0.290323	28	6	0.176471	23	6	0.206897
20	8	0.285714	20	6	0.230769	23	5	0.178571	29	7	0.194444	27	9	0.25	29	7	0.194444	24	4	0.142857	24	5	0.172414	25	10	0.285714	24	3	0.111111
22	10	0.3125	21	4	0.16	20	3	0.130435	27	14	0.341463	27	9	0.25	26	6	0.1875	21	5	0.192308	24	6	0.2	35	11	0.23913	21	3	0.125
19	6	0.24	15	5	0.25	19	5	0.208333	29	9	0.236842	25	9	0.264706	25	3	0.107143	21	5	0.192308	21	6	0.222222	33	10	0.232558	20	4	0.166667
23	5	0.178571	24	6	0.2	24	7	0.225806	26	6	0.1875	27	9	0.25	26	11	0.297297	22	7	0.241379	25	5	0.166667	31	10	0.243902	21	5	0.192308
19	7	0.269231	18	2	0.1	20	4	0.166667	25	10	0.285714	27	6	0.181818	28	9	0.243243	20	2	0.0909091	22	6	0.214286	27	6	0.181818	24	7	0.225806
18	4	0.181818	15	6	0.285714	20	4	0.166667	28	8	0.222222	21	5	0.192308	21	6	0.222222	16	4	0.2	22	6	0.214286	29	7	0.194444	24	4	0.142857
24	6	0.2	17	5	0.227273	27	6	0.181818	26	9	0.257143	29	8	0.216216	31	7	0.184211	20	4	0.166667	25	10	0.285714	22	5	0.185185	24	3	0.111111
									28	9	0.243243	23	5	0.178571
									31	7	0.184211	25	5	0.166667
		0.254665			0.21085			0.212486			0.255986			0.220159			0.203648			0.174014			0.219301			0.2212			0.17344
RARa403
55.2			55.4			55.6			55.8			55.1			55.12			55.14			55.16			55.18			55.2			55.21			55.22
basal	apical	apical/total	basal	apical	apical/total	basal	apical	apical/total	basal	apical	apical/total	basal	apical	apical/total	basal	apical	apical/total	basal	apical	apical/total	basal	apical	apical/total	basal	apical	apical/total	basal	apical	apical/total	basal	apical	apical/total	basal	apical	apical/total
16	10	0.384615	26	9	0.257143	28	17	0.377778	21	14	0.4	26	14	0.35	23	9	0.28125	31	18	0.367347	23	11	0.323529	33	15	0.3125	29	12	0.292683	15	11	0.423077	23	16	0.410256
15	6	0.285714	21	9	0.3	33	15	0.3125	20	13	0.393939	31	20	0.392157	21	11	0.34375	28	15	0.348837	25	12	0.324324	29	12	0.292683	26	13	0.333333	19	12	0.387097	20	12	0.375
13	20	0.606061	26	11	0.297297	37	17	0.314815	15	11	0.423077	25	11	0.305556	26	12	0.315789	30	16	0.347826	24	9	0.272727	22	11	0.333333	29	14	0.325581	24	12	0.333333	24	14	0.368421
23	21	0.477273	18	11	0.37931	24	13	0.351351	20	17	0.459459	33	21	0.388889	24	6	0.2	26	17	0.395349	22	9	0.290323	22	7	0.241379	35	16	0.313725	24	18	0.428571	21	13	0.382353
25	13	0.342105	26	6	0.1875	27	14	0.341463	24	14	0.368421	31	22	0.415094	29	15	0.340909	30	19	0.387755	16	15	0.483871	25	15	0.375	31	17	0.354167	25	12	0.324324	28	16	0.363636
26	10	0.277778	18	5	0.217391	24	12	0.333333	19	16	0.457143	30	16	0.347826	24	11	0.314286	30	19	0.387755	16	12	0.428571	22	13	0.371429	22	11	0.333333	25	13	0.342105	32	15	0.319149
17	6	0.26087	23	8	0.258065	29	14	0.325581	22	13	0.371429	27	17	0.386364	23	10	0.30303	27	16	0.372093	15	12	0.444444	13	13	0.5	29	13	0.309524	23	12	0.342857	25	15	0.375
22	12	0.352941	21	13	0.382353	36	18	0.333333	21	10	0.322581	31	14	0.311111	23	9	0.28125	28	19	0.404255	19	12	0.387097	24	13	0.351351	19	11	0.366667	21	5	0.192308	26	14	0.35
21	12	0.363636	17	13	0.433333	24	16	0.4	25	11	0.305556	27	16	0.372093	18	9	0.333333	32	17	0.346939	20	15	0.428571	26	14	0.35	28	13	0.317073	27	12	0.307692	22	10	0.3125
21	11	0.34375	22	5	0.185185	33	12	0.266667	19	10	0.344828	36	12	0.25	22	8	0.266667	33	19	0.365385	28	14	0.333333	19	10	0.344828	27	15	0.357143	32	16	0.333333	20	13	0.393939
20	13	0.393939	23	10	0.30303	30	14	0.318182	21	12	0.363636	32	12	0.272727	23	14	0.378378	31	14	0.311111	19	13	0.40625	23	14	0.378378	28	14	0.333333	23	8	0.258065	28	17	0.377778
25	15	0.375	20	12	0.375	25	14	0.358974	21	11	0.34375	32	9	0.219512	23	9	0.28125	29	21	0.42	21	15	0.416667	25	15	0.375	26	13	0.333333	20	13	0.393939	26	11	0.297297
29	6	0.171429	22	8	0.266667	31	15	0.326087	21	13	0.382353	25	14	0.358974	24	13	0.351351	29	18	0.382979	16	15	0.483871	21	10	0.322581	22	8	0.266667	24	10	0.294118	25	13	0.342105
27	14	0.341463	18	7	0.28	29	16	0.355556	19	15	0.441176	24	13	0.351351	21	11	0.34375	29	20	0.408163	20	13	0.393939				20	11	0.354839	25	13	0.342105	24	11	0.314286
31	13	0.295455	30	11	0.268293	27	13	0.325	23	9	0.28125	28	11	0.282051	21	11	0.34375				22	14	0.388889				25	10	0.285714	28	10	0.263158	25	13	0.342105
26	19	0.422222
22	14	0.388889
		0.357832			0.292704			0.336041			0.37724			0.33358			0.311916			0.3747			0.387094			0.349882			0.325141			0.331072			0.354922

## Sheet: 4J raw data
control
60.1					60.2					60.6					60.7					60.9					60.11					60.13					60.15					60.17
area	IntDen	mean	mean-bg		area	IntDen	mean	mean-bg		area	IntDen	mean	mean-bg		area	IntDen	mean	mean-bg		area	IntDen	mean	mean-bg		area	IntDen	mean	mean-bg		area	IntDen	mean	mean-bg		area	IntDen	mean	mean-bg		area	IntDen	mean	mean-bg
44	166439	3672.55	3436.55		97	389942	3892.9	3656.9		81	149266	1784.43	1548.43		82	227852	2921.98	2685.98		83	217707	3006.93	2770.93		92	168996	1909.63	1673.63		94	238918	2506.22	2270.22		90	213328	2160.51	1924.51		75	147362	2176.29	1940.29
65	233869				87	326351				87	150519				92	280573				75	257388				80	159461				96	237263				79	151798				79	187787
61	241495	3907.75	3671.75		85	253564	2669.07	2433.07		88	145760	1858.88	1622.88		79	186056	2468.98	2232.98		67	202146	3105.74	2869.74		86	175599	2441.79	2205.79		94	285128	2898.01	2662.01		75	192563	2592.88	2356.88		99	184968	2034.56	1798.56
66	254789				103	248222				81	168390				96	246015				71	226446				82	234622				99	274188				78	204147				81	181253
58	233697	4025.83	3789.83		101	289412	2631.41	2395.41		87	135604	1771.34	1535.34		90	179247	1999.14	1763.14		61	188237	3178.22	2942.22		85	137480	2069.49	1833.49		78	198125	2804	2568		70	141392	2407.9	2171.9		81	107691	1648.81	1412.81
75	301738				91	215818				77	154896				82	164605				73	237644				94	232958				88	267339				70	195714				74	147874
64	250172	3812.74	3576.74		111	230749	1864.76	1628.76		81	134163	1901.84	1665.84		23	67617	2930.8	2694.8		70	228472	3172.09	2936.09		71	178804	2497.91	2261.91		82	230589	2811.48	2575.48		73	117938	1638.95	1402.95		74	121618	1904.39	1668.39
65	241671				87	138474				91	192954				139	407172				70	215621				74	183393				83	233306				62	103320				76	164040
62	225406	3676.44	3440.44		95	254370	2701.19	2465.19		85	206823	2537.69	2301.69		41	84548	2343.02	2107.02		77	209395	2928.85	2692.85		73	161170	2680.92	2444.92		86	164652	1874.16	1638.16		68	166285	2502.42	2266.42		74	137282	1954.31	1718.31
69	256207				82	223741				81	214434				83	205986				80	250434				78	243649				83	152081				67	171542				76	155864
71	274211	3779.43	3543.43		93	252646	2703.58	2467.58		81	140316	1985.48	1749.48		69	166970	2401.72	2165.72		70	248077	3555.49	3319.49		79	128457	1885.77	1649.77		90	212286	2555.33	2319.33		77	162472	2149.21	1913.21		73	75457	1037.36	801.364
70	258689				91	244813				76	171404				82	195689				84	299469				76	163838				80	222120				69	151312				67	69774
56	218469	3826.88	3590.88		88	214279	2230.64	1994.64		82	145325	1821.8	1585.8		81	184411	2427.27	2191.27		74	216171	3161.49	2925.49		79	176879	2281.77	2045.77		77	147705	2008.15	1772.15		72	93800	1285.08	1049.08		65	88079	1388.95	1152.95
63	236930				94	191698				71	133411				85	218515				86	289668				71	165387				89	185648				71	89966				63	89706
64	219944	3410.15	3174.15		116	380532	3353.94	3117.94		78	210332	2855.63	2619.63		84	249315	2909.78	2673.78		75	247800	3394.01	3158.01		71	169786	2264.26	2028.26		80	230640	2881.79	2645.79		69	91044	1419.91	1183.91		77	133483	1713.7	1477.7
62	209735				90	310379				78	235147				77	219159				72	251120				69	147211				70	201629				66	100644				71	120145
67	263290	3983.39	3747.39		102	359586	3590.08	3354.08		93	136096	1593.23	1357.23		71	200749	2820.05	2584.05		63	172988	2820.31	2584.31		70	127863	2133.9	1897.9		80	177511	2039.12	1803.12		60	100827	2110	1874		73	109050	1740.49	1504.49
77	310318				94	344069				82	142719				80	225079				71	204933				65	160213				77	142631				68	169253				68	136359
69	273539	3912.3	3676.3		78	248182	3496.17	3260.17		89	127409	1735.54	1499.54		71	179128	2546.61	2310.61		62	222509	3543.6	3307.6		75	150829	2232.86	1996.86		95	295929	2979.45	2743.45		69	129696	2134.31	1898.31		83	95262	1427.68	1191.68
61	235060				102	381129				87	178046				83	213050				86	301944				86	208661				88	249311				65	156301				84	143160
145	34183	235.745			100	300837	3109.66	2873.66							69	212442	2985.87	2749.87		74	225278	3284.17	3048.17		79	248278	2832.45	2596.45		79	167985	1957.04	1721.04		74	157134	2156.81	1920.81		79	128761	1820.27	1584.27
					102	327315									104	304114				73	257495				66	162427				74	131442				65	142662				74	149741
					76	137254	2064.15	1828.15												65	196910	3221.91	2985.91		71	205008	3205.26	2969.26		74	133682	1882.06	1646.06							82	142742	1681.78	1445.78
					99	223972														85	286377				65	230908				69	135452									68	109525
																																								77	119005	1506.44	1270.44
			3564.75					2622.96					1748.59					2378.11					2961.73					2133.67					2197.07					1814.72		65	94909
RARa403																																											1459
60.3					60.4					60.5					60.8					60.1					60.12					60.14					60.16					60.18
area	IntDen	mean	mean-bg		area	IntDen	mean	mean-bg		area	IntDen	mean	mean-bg		area	IntDen	mean	mean-bg		area	IntDen	mean	mean-bg		area	IntDen	mean	mean-bg		area	IntDen	mean	mean-bg		area	IntDen	mean	mean-bg		area	IntDen	mean	mean-bg
99	263697	2879.02	2643.02		116	163236	1680.15	1444.15		85	113539	1326.9	1090.9		67	61313	888.213	652.213		81	99231	1318.2	1082.2		71	75047	1257.92	1021.92		90	61856	898.139	662.139		86	104266	1503.68	1267.68		116	129831	1215.91	979.91
93	289074				129	248400				94	123976				83	71919				103	143317				96	135025				97	106096				101	176923				94	125510
80	190354	2711.27	2475.27		111	183282	1607.13	1371.13		90	131001	1550.16	1314.16		79	113313	1468.6	1232.6		75	77351	1135.81	899.812		77	73199	1200.81	964.809		96	98145	1207.59	971.592		81	76572	1532.33	1296.33		116	138379	1136.77	900.771
72	221759				79	122073				93	152678				70	105508				79	97564				75	109324				95	132505				84	176262				102	109437
76	128137	1851.73	1615.73		118	204602	1760.63	1524.63		85	210724	2648.64	2412.64		77	106837	1253.24	1017.24		78	99959	1343.78	1107.78		73	88481	1352.97	1116.97		74	59399	921.034	685.034		79	130083	1724.12	1488.12		114	132838	1040.59	804.585
106	208877				107	191540				106	295167				94	107467				96	133859				70	104993				103	103624				65	118191				103	92969
84	296960	3419.94	3183.94		102	303481	2783.54	2547.54		96	221183	2366.95	2130.95		82	88638	1264.37	1028.37		82	73897	884.777	648.777		72	113140	1853.38	1617.38		105	183406	1853.52	1617.52		79	139283	1934.4	1698.4		86	73019	884.817	648.817
87	287850				110	286630				94	228538				102	144006				93	80939				60	131506				83	165055				72	152811				83	76515
73	162308	2568.19	2332.19		118	195895	1806.51	1570.51		96	296467	3193.73	2957.73		73	136520	2069.3	1833.3		78	79860	972.31	736.31		78	136353	1962.13	1726.13		87	115343	1455.72	1219.72		88	107453	1387.77	1151.77		85	85149	1063.74	827.744
86	246035				114	223216				101	332698				84	188360				106	99045				58	130497				97	152509				84	131243				79	89305
91	177983	2346.02	2110.02		105	205842	1794.11	1558.11		100	328727	2905.35	2669.35		77	99904	1453.04	1217.04		105	107076	1177.11	941.112		72	149285	2116.9	1880.9		104	118862	1287.13	1051.13		92	184481	1917.75	1681.75		83	67470	907.568	671.568
101	272452				121	199627				95	237817				82	131129				100	134232				64	138613				106	151436				76	137701				86	85909
					105	269296	2573.73	2337.73		99	285697	2873.09	2637.09		85	105561	1412.75	1176.75		91	91764	1168.87	932.868		49	56507	1628.14	1392.14		99	143263	1597.01	1361.01		96	136198	1403.64	1167.64		78	49094	865.578	629.578
					65	168238				101	288921				78	124717				114	147854				104	192598				85	150586				81	112247				83	90264
					99	322767	3239.22	3003.22		118	371083	2633.53	2397.53		71	97793	1510.89	1274.89		88	69039	861.478	625.478		69	143845	2347.09	2111.09		97	125154	1309.89	1073.89		92	115299	1216.95	980.953		84	89605	1119.88	883.878
					89	286206				102	208293				80	130351				115	105841				71	184747				90	119795				80	94017				64	76137
					93	221462	2535.06	2299.06		91	209440	2296.16	2060.16		68	134107	1782.56	1546.56		95	72114	912.301	676.301		81	116319	1497.74	1261.74		79	80735	1361.85	1125.85		93	129617	1547.04	1311.04		64	66056	1017.59	781.588
					84	227243				92	210757				68	108321				88	94837				73	114333				110	176655				97	164321				72	72336
					104	259194	2731.8	2495.8		100	249533	2429.62	2193.62		71	84749	1413.41	1177.41		92	67915	780.113	544.113		82	116464	1437.15	1201.15		111	94975	967.057	731.057		104	105483	1123.9	887.896		82	95816	1113.69	877.687
					79	240725				106	250968				79	127263				103	84207				74	107732				65	75227				89	111429				81	85715
					91	260889	2921.52	2685.52		90	244808	3071.35	2835.35		78	147208	2095.55	1859.55		91	73329	1115.42	879.423		94	147644	1696.03	1460.03		103	89110	1156.01	920.011		89	95375	1218.98	982.983		89	64354	809.397	573.397
					71	212398				98	332605				64	150360				105	145294				55	105065				87	130532				89	121604				90	80528
										97	333861	3441.87	3205.87		81	112355	1401.04	1165.04		102	79639	999.922	763.922		86	116859	1413.31	1177.31		85	97137	1224.55	988.552		88	129583	1507.85	1271.85		101	63652	764.441	528.441
															80	113212				129	151343				94	137537				89	115935				82	126752				85	78534
															77	152640	1852.28	1616.28							88	106652	1238.27	1002.27		88	151156	1848.46	1612.46		90	145669	1664.52	1428.52		86	88370	1407.84	1171.84
			2343.43					2076.13					2325.45		93	162247							819.841		88	111283				69	139053				91	155609				88	156595
															98	177046	1939.73	1703.73							83	116866	1804.07	1568.07		83	81312	1009.9	773.899		102	108178	1399.85	1163.85		100	132982	1405.57	1169.57
															87	181804									81	179001				75	78252				86	154993				99	146726
															85	117286	1478.03	1242.03							90	131392	1513.78	1277.78		75	91714	1220.43	984.429		98	170656	1614.17	1378.17		83	78494	852.158	616.158
															99	154671									94	147144				65	79146				105	157021				88	67225
															80	93178	1267.07	1031.07												94	103836	1195.96	959.964		86	115435	1348.23	1112.23		105	117272	1136.23	900.227
															82	112088														73	95890				100	135336				80	92930
															75	132163	1804.81	1568.81										1385.31		85	99335	1275.78	1039.78		93	127718	1451.67	1215.67		92	81839	871.343	635.343
															91	167436														75	104790				91	139390				80	68032
															82	98389	1393.58	1157.58												71	99152	1540.52	1304.52		89	116111	1415.94	1179.94
															98	152456														70	118061				89	135926
																		1305.58
