# Supplementary material for: Completion of neural crest cell production and emigration is regulated by retinoic-acid-dependent inhibition of BMP signaling
Source: eLife. 2022 Apr 8;11:e72723. doi: 10.7554/eLife.72723 (PMC8993216; doi:10.7554/eLife.72723)
Supplement: Figure 5—figure supplement 1—source data 1. [file elife-72723-fig5-figsupp1-data1.xlsx]

## Sheet: גיליון1
			Figure 5- figure supplement 1C
			RARa403
			GFP+	GFP+HNK1+		ratio
			58	52		0.896552
			183	177		0.967213
			101	99		0.980198
			151	145		0.960265
			107	103		0.962617
			112	109		0.973214
			79	74		0.936709
			35	33		0.942857
			94	90		0.957447
