# Supplementary material for: Completion of neural crest cell production and emigration is regulated by retinoic-acid-dependent inhibition of BMP signaling
Source: eLife. 2022 Apr 8;11:e72723. doi: 10.7554/eLife.72723 (PMC8993216; doi:10.7554/eLife.72723)
Supplement: Figure 5—figure supplement 2—source data 1. [file elife-72723-fig5-figsupp2-data1.xlsx]

## Sheet: Sheet2
	A-C RARE-RFP								D-F pSmad
				normalized with control mean = 1
	control	RAR-VP16		control	RAR-VP16				control						VP16-RAR
	0.0622768	0.112307		0.88707	1.5997					rostral	caudal	fraction rostral	fraction caudal			rostral	caudal	fraction rostral	fraction caudal
	0.0702792	0.11249		1.00106	1.60231				96.1	70	252	0.22	0.78		96.2	114	229	0.33	0.67
	0.0627059	0.232002		0.893183	3.30464				96.3	111	205	0.35	0.65		96.4	126	216	0.37	0.63
	0.062418	0.11226		0.889082	1.59903				96.5	123	178	0.41	0.59		96.6	66	130	0.34	0.66
	0.110799	0.172524		1.57822	2.45743				96.7	100	251	0.28	0.72		96.8	93	193	0.33	0.67
	0.0589069	0.129067		0.83907	1.83843				96.9	85	148	0.36	0.64		96.1	88	216	0.29	0.71
	0.061616	0.177762		0.877658	2.53204				96.11	135	215	0.39	0.61		96.12	74	240	0.24	0.76
	0.0481433	0.144462		0.685753	2.05771										96.13	69	248	0.22	0.78
	0.166186	0.121962		1.02122	1.73722										96.14	45	236	0.16	0.84
	0.0716949	0.132856		1.32773	1.8924
	0.0932132									104	208.17		0.66			84.38	213.5		0.69
				1	2.06209
	G-I Sox9				J-N foxd3
	control	VP16-RAR			control tail	VP16 tail	control +	VP16 +	control -	VP16 -
	7	7			0.165975	0.364583	0.834025	0.635417	0	0
	7	8			0.143478	0.083333	0.856521	0.916666	0	0
	6	6			0.150862	0.104651	0.849138	0.678294	0	0.217054
	7	7			0.154229	0.078014	0.845772	0.744681	0	0.177305
	6	6			0.238342	0.194444	0.761658	0.805556	0	0
	7	5			0.112403	0.07874	0.887597	0.637795	0	0.283465
	6	9			0.218487		0.781513		0
	7	9			0.107011		0.752768		0.140221
	7				0.068249		0.830861		0.10089

## Sheet: Raw Data A-C
	control				RFP/GFP			RAR-VP16				RFP/GFP
		Area	Mean	RawIntDen					Area	Mean	RawIntDen
GFP	1	2456208	27	61946179				1	2456208	16	35998546
RFP		2456208	3	3857808	0.0622768				2456208	3	4042883	0.112307
	2	2456208	15	33968228				2	2456208	23	52881606
		2456208	2	2387259	0.0702792				2456208	4	5948677	0.11249
	3	2456208	19	43797316				3	2456208	12	25403333
		2456208	2	2746352	0.0627059				2456208	4	5893630	0.232002
	4	2456208	24	56342048				4	2456208	22	50567945
		2456208	3	3516759	0.062418				2456208	4	5676737	0.11226
	5	2456208	12	25807984				5	2456208	11	23274105
		2456208	2	2859492	0.110799				2456208	3	4015345	0.172524
	6	2456208	37	87060219				6	2456208	14	30643276
		2456208	3	5128451	0.0589069				2456208	3	3955036	0.129067
	7	2456208	30	69741686				7	2456208	18	40401459
		2456208	3	4297201	0.061616				2456208	4	7181825	0.177762
	8	2456208	33	77927329				8	2456208	16	36955923
		2456208	3	3751680	0.0481433				2456208	3	5338717	0.144462
	9	2456208	7	13098699				9	2456208	19	44576283
		2456208	2	2176823	0.166186				2456208	4	5436606	0.121962
	10	2456208	21	48574253				10	2456208	16	35933313
		2456208	3	3482527	0.0716949				2456208	3	4773966	0.132856
	11	2456208	29	68222825
		2456208	4	6359268	0.0932132

## Sheet: Raw Data J-N
		tail	+	-	sum					tail	+	-
control	89.1	40	201		241			control	89.1	0.165975	0.834025	0
	89.3	33	197		230				89.3	0.143478	0.856522	0
	89.5	35	197		232				89.5	0.150862	0.849138	0
	89.7	31	170		201				89.7	0.154229	0.845771	0
	89.9	46	147		193				89.9	0.238342	0.761658	0
	89.11	29	229		258				89.11	0.112403	0.887597	0
	89.13	52	186		238				89.13	0.218487	0.781513	0
	89.14	29	204	38	271				89.14	0.107011	0.752768	0.140221
	89.15	23	280	34	337				89.15	0.0682493	0.830861	0.10089
RAR-VP16	89.2	70	122		192			RAR-VP16	89.2	0.364583	0.635417	0
	89.4	20	220		240				89.4	0.0833333	0.916667	0
	89.6	27	175	56	258				89.6	0.104651	0.678295	0.217054
	89.8	22	210	50	282				89.8	0.0780142	0.744681	0.177305
	89.1	42	174		216				89.1	0.194444	0.805556	0
	89.12	20	162	72	254				89.12	0.0787402	0.637795	0.283465
