# Supplementary material for: Completion of neural crest cell production and emigration is regulated by retinoic-acid-dependent inhibition of BMP signaling
Source: eLife. 2022 Apr 8;11:e72723. doi: 10.7554/eLife.72723 (PMC8993216; doi:10.7554/eLife.72723)
Supplement: Figure 5—figure supplement 3—source data 1. [file elife-72723-fig5-figsupp3-data1.xlsx]

## Sheet: Sheet1
		control	RAR-VP16
		787.711	552.392
		984.763	878.312
		696.005	574.247
		745.646	837.965
		1115.09	749.146
		1097.11	744.973
		621.114	761.597
		718.531	466.311
		634.27	728.896
		680.066	424.061
		589.127	668.076
		430.662	371.646
		634.652	389.151
		488.237	292.285
		390.224	478.667
		776.936	263.463
		711.884	573.824

## Sheet: Raw Data
control	area(micron_squared)
87.1	87.3	87.5	87.7	87.9	87.11	87.13	87.15	90.1	90.3	90.5	90.7	90.9	90.11	90.15	90.17
559.26	170.89	39.46	44.82	1050.76	981.6	172.05	161.76	835.39	657.68	825.83	482.56	847.31	411.84	202.99	736.66
620.13	120	439.04	123.78	645.57	1188.04	520.57	523.03	1094.38	1150.42	573.15	643.17	776.73	620.9	583.36	593.13
606.43	105.49	146.24	235.93	745.89	1456.32	709.38	427.36	913.87	475.3	928.9	695.68	520.1	753.71	331.17	697.48
248.53	461.47	690.2	223.22	2072.84	904.72	898.67	424.64	632.91	1211.51	977.27	767.46	1389.49	314.75	432.85	1126.52
677.88	586.68	33.81	517.29	1318.48	2016.56	669.7	468.69	674.95	530.23	354.51	295.99	583.15	490.81	168.43	911.37
997.92	688.7	500.08	486.06	868.55	1706.78	1170.21	878.09	809.86	442.81	469.78	213.29	484.7	424.64	254.86	955.91
554.53	844.63	532.14	400.39	370.66	668.22	499.73	1487.6	537	609.53	738.39	195.59	1099.65	713	243	657.68
1268.87	516.52	445.78	322.24	1323.76	728.92	1110.4	926.21	1051.48	1117.22	980.71	368.75	504.75	501.95	267.86	642.38
891.35	862.31	395.66	632.04	1661.15	1300.93	647.04	746.23	355.26	841.31	418.1	552.8	497.97	551.84	523.9	993.15
1775.38	679.31	898.03	907.97	1137.84	563.96	646.23	686.72	347.84	412.09	785.2	506.12	691.97	465.93	498.68	982.57
1579.51	1882.78	217.03	783.98	559.3	947.71	326.29	530.41	267.22	434.69	516.78	129.31	672.47	483.25	203.99	817.22
958.4	2524.51	734.74	581.19	1294.45	1064.26	494.8	417.93	800.44	457.73	406.54	276.28	236.4	1115.47	320.8	863.64
1630.21	1406.61	1302.99	964.89	2208.81	573.23	994.19	671.68	260.87	679.1	293.08	384.5	749.91	726.46	470.83	891.28
1118.6	730.88	536.32	1495.32	617.21	1102.69	656.37	250.4	720.71	659.24	384.2	854.39	322.13	261.34	281.58	295.22
789.04	1313.34	586.87	538.7	965.98	514.82	990.65	339.11	753.05	889.93	622.8	448.19	551.49	377.62	281.15	416.15
984.71	910.52	1229.14	835.58	2726.51	730.84	1307.75	1990.55	681.02	848.94	746.98	468.46	486.71	486.24	416.88	1120.17
508.15	896.22	1223.95	421.12	2397.76	1118.18	948.96	1026.32	356.78	449.2	1028.74	403.09	785.78	343.12	244.52	666.21
704.3	1798.39	1469.4	546.42	875.77	2137.02	358.83	923.69	449.11	714.62	722.72	289.98	752.07	351.88	336.11	697.78
871.05	1390.58	627.84	853.87	805.59	704.13	198.8	850.31	780.07	489.6	370.67	390.87	729.22	134.46	326.38	1268.83
421.82	661.66	1225.36	1328.17	748.08	1573.56	191.88	656.56	911.71	623.48	757.78	265.44	644.66	413.61	577.42	221.22
232.48	1447.26	1342.02	839.85	1330.9	1962.59	173.12	857.1	175.82	521.16	481.39	226.12	352.74	787.27	1076.42	468.43
531.34	1751.29		1005.62	953.4	1092.71	129.2	824.8	544.21	896.6	363.34	470	605.1	359.58	371.72	820
59.14	791.23		2193.57	853.54	724.24	470.81	438.1		979.43	565.3	577.19	626.39	581.7	392.26	798.77
316.03	1877.9		1694.91	1702.22	568.59		737.46		680.59	256.23		678.01	287.87	457.96	1004.69
	1169.86		637.14	1281.19					229.24	159.79		277.41	246.68	490.47	562.14
	736.89		1036.68	697.59
	971.98		882.81	357.5
	472.44		952.99	881.18
	787.78		1070.59	667.88
			488.31	1168.39
			333.9	1156.98
			645.84	550.07
			706.04	889.19
			620.72	1186.48
				745.16
				845.14
				1965.72
				745.89
787.711	984.763	696.005	745.646	1115.09	1097.11	621.114	718.531	634.27	680.066	589.127	430.662	634.652	488.237	390.224	776.936
RAR-VP16
87.2	87.4	87.6	87.8	87.1	87.12	87.14	90.2	90.4	90.6	90.8	90.1	90.12	90.14	90.18	90.19
827.64	1656.99	58.48	55.5	500.76	933.49	260.52	799.78	788.34	689.19	1014.09	71.03	311.4	453.56	508.77	34.33
730.03	598.66	684.43	652.66	575.83	98.06	129.8	485.79	698.51	483.01	1556.18	469.4	650.29	189.25	330.85	225.45
388.97	636.82	1017.3	702.82	804.24	812.69	511.52	360.58	839	531.08	717.59	800.95	245.14	198.01	682.13	449.99
1176.07	841.56	287.32	663.36	468.5	814.14	746.15	430.99	498	316.64	521.31	297.68	220.64	377.19	929.3	1164.78
508.84	849.41	86.78	669.75	645.24	636.76	310.77	460.36	970.83	207.95	179.35	228.75	408.05	200.28	762.18	343.87
507.06	1297.56	515.34	476.79	484.28	356.35	608.8	371.7	608.03	271.79	300.22	483.87	565.56	277.46	347.09	77.44
495.97	657.51	338.04	807.18	640.29	937.79	583.49	352.8	1014.07	475.79	219.38	181.06	942.98	449.07	399.25	290
494.34	1050.83	691.42	1369.93	812	865.35	679.16	624.19	699.62	110.93	445.05	458.39	286.63	300.8	542.26	163.17
149.44	1601.47	268.19	1822.65	827.43	449.13	1631.91	286.69	615.21	821.11	741.98	553.76	464.16	303.34	252.62	86.84
80.39	1055.91	272.67	488.05	389.33	865.82	444.66	343.27	1181.33	669.91	1763.26	462.15	297.23	493.85	374.56	117.45
365.19	678.39	312.14	712.3	469.96	942.13	476.56	804.14	971.41	568.91	1784.16	591.02	240.84	193.8	477.73	143.74
821.98	813.35	528.89	2539.8	1168.66	1042.37	1015.09	308.26	997.44	1112.27	738.37	522.34	112.62	129.7	417.41	153.42
1193.3	1070.29	617.44	1007.29	1276.21	409.23	553	501.16	1144.52	350.43	792.08	479.66	263.76	106.96	492.35	201.32
1114.21	982.7	280.2	608.84	501.53	1125.62	648.93	634.55	764.87	404.46	1010.72	353.59	281.48	518.58	750.15	91.05
1039.81	1357.89	301.64	1015.16	1453.09	1086.55	1036.59	684.36	488.72	161.5	985.77	209.83	579.52	396.62	641.99	235.91
667.02	890.14	977.38	1613.56	882.1	528.75	1516	849.94	503.49	324.86	207.93	574.47	577.98	424.13	581.42	440.14
444.4	552.02	756.87	1309.95	711.93	724.92	964.5	705.69	739.74	542.03	758.97	102.28	472.39	494.51	766.24	343.23
386.07	763.7	571.76	597.44	826.15	1044.17	1676.07	279.85	518.96	244.8	708.85	262.62	283.83	294.11	177.77	124.01
200.42	1212.05	983.52	1833.63	430.36	892.11	750.13	125.62	491.69	588.96	425.47	404.76	530.18	54.55	339.01	322.13
384.55	770.31	399.52	1179.58	810.65	837.22	432.94	424.58	587.25	429.06	138.5	486.13	342.35	161.08	287.14	126.28
288.84	698.47	1106.6	757.29	640.61	335.12	1292.42	597.94	686.51	238.21	260.51	288.72	362.03	307.17	618.14	217.55
385.83	1526.44	1409.42	968.36	516.6	878.84	1170.06	270.38	784.9	152.08	344.51	250.63	253.13	310.44	149.77	444.09
485.28	431.99	502.88	291.75	420.89	843.01	415.51	345.32	692.5	225.39	602.51	425.79	527.32	187.58	327.17
344.9	297.52	267.81	573.22	790.97	419.74	423.76	164	265.77	293.98	221.99	142.97	211.99	161.78	592.53
354.78	71.83	593.3	971.73	741.32			445.84	671.7	387.19	263.14	189.31	297.27	323.3	218.85
526.87	472.31	1016.31	220.3	309.78
		296.28	373.71	1564.34
		548.93	345.69	817.34
		708.35	424.51	550.09
		774.51	559.71	1249.74
		627.94	364.4	943.3
552.392	878.312	574.247	837.965	749.146	744.973	761.597	466.311	728.896	424.061	668.076	371.646	389.151	292.285	478.667	263.463
