# Supplementary material for: Completion of neural crest cell production and emigration is regulated by retinoic-acid-dependent inhibition of BMP signaling
Source: eLife. 2022 Apr 8;11:e72723. doi: 10.7554/eLife.72723 (PMC8993216; doi:10.7554/eLife.72723)
Supplement: Figure 5—source data 1. [file elife-72723-fig5-data1.xlsx]

## Sheet: גיליון1
	Figure 5D							Figure 5I
		embryo	GFP+ cells EP side	GFP+ cells non EP side				control	RAR403	Smad6	RAR403 + Smad6
	control	49.1	5	9			GFP+ cells outside NT in 70 rostral sections	1	29	2	22
		49.5	4	3				0	9	15	22
		49.7	23	8				0	129	13	11
		49.9	1	16				1	32	2	13
		49.11	6	0				0	89	24	18
		49.13	7	16				1	13	17	0
		49.15	2	0				0	22		23
		49.17	14	13				0	123		9
		49.19	0	0				6	43		17
		49.21	2	4				5	46		9
		49.23						2	58		16
								1	183		21
	RARa403	49.2	39	4				3	101
		49.4	29	0				25	151
		49.6	16	0				0	107
		49.8	58	6				0	112
		49.1	10	4				0	79
		49.12	40	16				1	35
		49.14	45	1				0	94
		49.16	28	0				9
		49.18	26	6				1
		49.2	48	17
		49.22	47	9
		49.23	20	5

## Sheet: Raw Data 5I
control																						RARa403																				Smad6							RARa403+Smad6
0	0	0	0	0	0	0	0	0	0	0	0	0	0	0	0	0	0	0	0	0		1	0	0	0	2	1	0	0	1	0	0	3	0	1	0	0	2	0	0		0	1	0	0	0	0		0
0	0	0	0	0	0	0	0	0	0	0	0	0	0	0	0	0	0	0	1	0		0	0	0	0	3	0	0	0	0	1	0	3	0	1	0	0	1	0	0		0	2	0	0	0	0		1
0	0	0	0	0	0	0	0	0	0	0	0	0	0	0	0	0	0	0	0	0		0	0	0	0	1	0	0	0	1	0	0	3	0	0	0	0	0	0	0		0	1	1	0	0	1		0
0	0	0	0	0	0	0	0	0	0	0	1	0	0	0	0	0	0	0	0	0		0	0	0	0	1	0	0	0	2	1	0	3	0	0	0	1	0	0	0		0	0	0	0	1	0		1
0	0	0	0	0	0	0	0	0	0	0	0	0	0	0	0	0	0	0	0	0		0	0	0	2	0	0	0	0	0	0	0	1	0	0	0	0	2	0	0		0	0	0	0	0	0		0
0	0	0	0	0	0	0	0	0	0	0	0	0	0	0	0	0	0	0	0	0		0	0	0	0	0	1	0	0	0	0	0	0	1	0	0	0	2	0	0		0	0	0	0	0	0		0
0	0	0	0	0	0	0	0	0	0	0	0	0	0	0	0	0	0	0	0	0		0	0	0	1	1	0	0	0	1	0	0	0	0	0	0	0	0	0	0		0	0	0	0	2	0		0
0	0	0	0	0	0	0	0	0	0	0	0	0	0	0	0	0	0	0	0	0		0	1	1	0	0	0	0	0	1	0	0	0	0	0	1	0	0	0	0		0	0	0	0	1	0		2
0	0	0	0	0	0	0	0	0	0	0	0	0	0	0	0	0	0	0	0	0		0	3	3	0	0	0	0	0	1	1	0	0	1	0	1	0	0	0	1		0	0	0	0	1	0		0
0	0	0	0	0	0	0	0	0	0	0	0	0	0	0	0	0	0	0	0	0		1	2	2	1	0	0	0	0	1	1	0	0	1	2	0	0	1	0	3		0	1	0	0	0	0		1
0	0	0	0	0	0	0	0	0	0	0	0	0	0	0	0	0	0	0	0	0		1	4	1	0	0	0	0	1	0	1	0	0	1	2	0	0	1	0	1		0	0	0	0	0	0		2
0	0	0	0	0	0	0	0	0	0	0	0	0	0	0	0	0	0	0	0	0		2	2	0	1	0	0	1	1	0	0	0	0	0	4	0	0	0	0	1		0	0	1	0	0	0		0
0	0	0	0	0	0	0	0	0	0	0	0	0	0	0	0	0	0	0	0	0		1	3	1	0	0	0	2	0	0	0	0	0	1	2	1	0	0	0	0		0	0	0	0	0	0		0
0	0	0	0	0	0	0	0	0	0	0	0	0	0	0	0	0	0	0	0	0		0	2	0	2	2	1	0	1	0	0	0	0	0	0	2	0	0	0	0		0	0	0	0	0	0		0
0	0	0	0	0	0	0	0	0	0	0	0	0	0	0	0	0	0	0	0	0		0	1	0	1	3	2	0	0	2	1	0	0	0	1	2	0	1	0	0		0	0	0	0	0	0		0
0	0	0	0	0	0	0	0	0	0	0	0	0	0	0	0	0	0	0	0	0		0	1	0	1	2	1	0	0	3	1	2	0	0	2	1	0	0	0	0		0	0	0	0	0	0		1
0	0	0	0	0	0	0	0	0	0	0	0	0	0	0	0	0	0	0	0	0		0	2	0	3	0	2	0	0	4	1	1	0	0	0	0	0	1	0	1		0	0	0	0	0	0		0
0	0	0	0	0	0	0	0	0	0	0	0	0	0	0	0	0	0	0	0	0		0	0	1	3	0	0	0	0	1	2	0	0	0	0	0	0	3	0	2		0	2	1	0	0	0		0
0	0	0	0	0	0	0	0	0	0	0	0	0	0	0	0	0	0	0	0	0		0	4	3	6	0	0	0	0	0	1	0	0	0	2	0	0	4	0	2		0	2	0	0	0	0		0
0	0	0	0	0	0	0	0	0	0	0	0	0	0	0	0	0	0	0	0	0		0	0	0	6	0	0	0	1	0	1	0	0	0	3	0	0	2	0	0		0	1	0	0	0	0		0
0	0	0	0	0	0	0	0	0	0	0	0	0	0	0	0	0	0	0	0	0		0	0	1	5	0	0	2	0	0	1	0	0	0	3	0	0	1	0	0		0	0	0	0	0	0		0
0	0	0	0	0	0	0	0	0	0	0	0	0	0	0	0	0	0	0	0	0		0	0	2	2	0	0	4	0	1	0	0	1	0	4	0	0	3	0	1		0	0	0	0	0	0		0
0	0	0	0	0	0	0	0	1	0	0	0	0	1	0	0	0	0	0	0	0		0	0	2	3	1	1	2	0	0	0	1	1	0	3	0	0	3	0	1		0	0	0	0	0	0		0
0	0	0	0	0	0	0	0	0	0	0	0	0	0	0	0	0	0	0	0	0		0	2	2	2	3	0	0	0	0	0	2	1	0	1	1	0	3	0	1		0	0	0	0	0	0		0
0	0	0	0	0	0	0	0	0	0	0	0	0	1	0	0	0	0	0	0	0		0	6	1	0	4	1	3	0	1	1	0	0	1	2	1	0	2	0	0		0	0	0	0	0	0		1
0	0	0	0	0	0	0	0	0	0	0	0	0	1	0	0	0	0	0	0	0		0	3	0	1	2	2	0	0	1	0	0	0	0	2	0	0	2	0	0		0	0	1	0	0	0		1
1	0	0	0	0	0	0	0	0	0	0	0	0	1	0	0	0	0	0	0	0		0	4	2	0	0	5	2	0	0	0	0	0	0	1	0	0	6	0	0		0	0	1	0	0	0		0
0	0	0	0	0	0	0	0	0	0	0	0	0	0	0	0	0	0	0	0	0		0	4	0	1	1	7	3	0	4	0	0	0	0	2	0	0	5	0	1		0	0	1	0	1	0		0
0	0	0	0	0	0	0	0	0	1	0	0	0	0	0	0	0	0	0	0	0		2	4	2	3	2	6	2	0	1	0	2	2	0	1	0	0	3	0	2		0	0	0	0	2	0		0
0	0	0	0	0	0	0	0	0	0	0	0	0	0	0	0	0	0	0	1	0		2	4	1	1	0	4	0	0	0	0	1	2	0	2	0	0	2	0	2		0	0	0	0	1	0		0
0	0	0	0	0	0	0	0	0	0	0	0	0	0	0	0	0	0	0	0	0		0	5	1	1	0	1	0	3	1	0	0	3	0	0	0	0	1	0	0		0	0	0	0	0	0		2
0	0	0	1	0	0	0	0	0	1	0	0	0	1	0	0	0	0	0	1	0		0	6	0	1	1	4	0	1	2	0	0	1	0	0	0	0	2	1	0		0	1	0	0	0	0		0
0	0	0	0	0	0	0	0	0	0	1	0	0	1	0	0	0	0	0	1	0		0	5	1	4	2	4	1	0	4	0	0	0	1	1	0	0	4	0	0		0	1	1	0	0	0		0
0	0	0	0	0	0	0	0	0	1	0	0	0	1	0	0	0	0	0	0	0		0	1	1	2	2	1	0	2	3	0	0	0	1	1	0	0	4	1	0		0	0	0	0	1	0		0
0	0	0	0	0	0	0	0	0	0	0	0	0	0	0	0	0	0	0	0	0		1	4	0	0	0	1	0	0	1	0	0	3	1	2	0	0	3	2	0		0	0	0	0	0	1		1
0	0	0	0	0	0	0	0	0	0	0	0	0	0	0	0	0	0	0	0	0		4	5	0	2	1	3	0	0	1	0	0	4	0	0	0	0	0	4	1		1	0	0	0	0	1		1
0	0	0	0	0	1	0	0	0	0	0	0	0	0	0	0	0	0	0	0	0		2	4	1	2	2	1	0	0	3	0	0	3	0	2	0	0	0	3	2		0	0	0	0	0	2		0
0	0	0	0	0	0	0	0	0	0	0	0	0	0	0	0	0	0	0	0	0		0	2	2	1	1	0	0	1	6	3	0	2	1	2	0	0	0	2	3		0	0	0	0	1	1		0
0	0	0	0	0	0	0	0	0	1	1	0	0	1	0	0	0	0	0	0	0		0	2	1	0	0	1	1	1	5	1	0	4	1	3	0	0	1	1	1		0	0	0	0	0	0		0
0	0	0	0	0	0	0	0	0	0	0	0	0	1	0	0	0	0	0	0	0		0	1	0	0	0	1	4	0	2	0	0	6	0	1	0	0	1	0	1		0	0	0	1	0	0		0
0	0	0	0	0	0	0	0	0	0	0	0	0	1	0	0	0	0	0	0	0		0	3	0	1	0	3	4	0	0	1	0	4	0	1	0	0	1	0	0		0	0	1	0	0	1		0
0	0	0	0	0	0	0	0	0	1	0	0	0	2	0	0	0	0	0	0	0		0	3	1	2	0	5	3	0	2	0	0	2	0	2	0	0	1	0	0		0	0	0	0	0	0		0
0	0	0	0	0	0	0	0	0	0	0	0	0	2	0	0	0	0	0	0	0		0	5	3	1	0	1	2	0	1	0	0	5	0	2	0	0	2	0	0		0	0	0	0	0	2		0
0	0	0	0	0	0	0	0	0	0	0	0	0	1	0	0	0	0	0	0	0		0	2	2	2	2	0	4	2	0	0	0	2	0	2	0	0	1	0	0		0	0	0	0	0	1		0
0	0	0	0	0	0	0	0	0	0	0	0	0	0	0	0	0	0	0	0	0		0	5	0	3	4	3	5	3	1	0	0	0	0	1	0	0	0	2	0		0	0	1	0	2	1		1
0	0	0	0	0	0	0	0	0	0	0	0	0	0	0	0	0	0	0	0	0		2	3	1	2	3	3	0	2	0	2	0	0	0	2	0	2	0	4	1		0	0	0	0	1	1		3
0	0	0	0	0	0	0	0	0	0	0	0	0	0	0	0	0	0	0	0	0		2	3	2	1	1	3	1	1	0	1	0	0	1	4	0	0	0	0	2		0	0	1	0	1	0		0
0	0	0	0	0	0	0	0	0	0	0	0	0	1	0	0	0	0	0	0	0		5	3	2	1	2	3	0	0	1	0	0	4	1	3	1	4	1	2	0		0	0	0	0	0	0		0
0	0	0	0	0	0	0	0	0	0	0	0	0	1	0	0	0	0	0	0	1		3	4	4	0	1	1	0	0	0	1	0	1	0	3	1	3	0	2	0		0	0	1	0	0	0		0
0	0	0	0	0	0	0	0	0	0	0	0	1	1	0	0	0	0	0	1	0		2	8	4	0	1	4	0	0	3	3	0	6	1	1	0	2	0	1	1		0	1	0	0	0	3		0
0	0	0	0	0	0	0	0	0	0	0	0	0	0	0	0	0	0	0	2	0		0	6	4	0	1	3	0	0	1	2	0	4	1	2	0	0	2	3	0		0	0	0	0	1	1		1
0	0	0	0	0	0	0	0	0	0	0	0	0	0	0	0	0	0	0	2	0		1	1	1	1	2	0	1	1	1	1	0	4	2	0	1	0	2	1	0		0	1	0	0	0	0		0
0	0	0	0	0	0	0	0	0	0	0	0	0	0	0	0	0	0	0	0	0		2	1	0	1	1	2	1	0	1	0	0	4	1	2	0	0	0	0	0		0	0	0	0	0	1		0
0	0	0	0	0	0	0	0	0	0	0	0	0	0	0	0	0	0	0	0	0		3	2	1	2	1	3	3	0	0	0	0	9	0	1	0	0	2	0	0		0	0	0	1	2	0		0
0	0	0	0	0	0	0	0	0	0	0	0	0	0	0	0	0	0	0	0	0		2	3	0	5	0	2	5	0	1	0	0	6	0	0	0	0	0	0	3		0	1	0	0	0	0		1
0	0	0	0	0	0	0	0	0	0	0	0	0	0	0	0	0	0	0	0	0		2	1	2	3	0	0	4	0	0	0	0	3	0	0	0	0	1	0	4		1	0	0	0	0	0		2
0	0	0	0	0	0	0	0	0	0	0	0	0	0	0	0	0	0	0	0	0		4	1	4	1	4	1	1	0	3	0	0	1	1	1	0	1	4	2	3		0	0	0	0	2	0		0
0	0	0	0	0	0	0	0	0	0	0	0	1	0	0	0	0	0	0	0	0		6	2	4	2	4	2	0	0	1	0	0	1	1	1	0	1	4	0	1		0	0	0	0	0	0		0
0	0	0	0	0	0	0	0	0	0	0	0	1	1	0	0	0	0	0	0	0		2	4	0	2	6	1	1	0	0	0	0	5	1	3		1	2	1	0		0	0	0	0	0	0		0
0	0	0	0	0	0	0	0	0	0	0	0	0	1	0	0	0	0	0	0	0		1	3	0	2	9	0	4	0	0	0	0	4	2	2		3	3	2	0		0	0	0	0	0	0		0
0	0	0		0	0	0	0	0	0	0	0	0	0	0	0	0	0	0	0	0		0	3	0	3	5	0	3	0	2	0	0	0	1	1		0	3	4	0		0	0	1	0	0	0		0
0	0	0		0	0	0	0	3	0	0	0	0	0	0	0	0	0	0	0	0		0	0	2	3	4	0	4	0	2	0	0	3	1	0		0	7	3	0		0	0	0	0	1	0		0
0	0	0		0	0	0	0	0	0	0	0	0	0	0	0	0	0	0	0	0		0	1	3	0	0	3	1	0	2	0	0	3	0	2		0	9	2	0		0	0	1	0	1	0		0
0	0	0		0	0	0	0	0	0	0	0	0	0	0	0	0	0	0	0	0		0	2	3	0	0	4	2	1	0	0	0	5	0	0		0	6	0	1		0	0	0	0	1	0		0
0	0	0		0	0	0	0	1	0	0	0	0	0	0	0	0	0	0	0	0		0	3	1	2	3	1	0	2	0	0	0	3	2	0		3	3	0	2		0	0	0	0	1	0		0
0	0	0		0	0	0	0	1	0	0	0	0	0	0	0	0	1	0	0	0		0	3	1	6	1	1	0	0	1	0		4	5	0		1	3	0	1		0	0	0	0	0	0		0
0	0	0		0	0	0	0	2	0	0	0	0	0	0	0	0	0	0	0	0		0	1	5	7	0	0	1	0	1	1		5	3	0		0	1	1	0		0	0	0	0	0	0		0
0	0	0		0	0	0	0	0	0	0	0	0	0	0	0	0	0	0	0	0		0	3	7	10	1	0	0	0	0	0		0	0	1		0	2	1	0		0	0	0	0	0	0		0
0	0	0		0	0	0	0	0	2	0	0	0	0	0	0	0	0	0	0	0		0	4	2	10	1	0	0	2	1	0		4	0	1		0	0	1	0		0	0	2	0	1	0		0
0	0	0		0	0	0	0	1	1	0	0	0	0	0	0	0	0	0	0	0		0	3	3	8	1	3	2	2	1	0		5	2	1		0	3	0	0		0	0	0	0	0	0		0
[truncated: 12 more columns]
