# Supplementary material for: Completion of neural crest cell production and emigration is regulated by retinoic-acid-dependent inhibition of BMP signaling
Source: eLife. 2022 Apr 8;11:e72723. doi: 10.7554/eLife.72723 (PMC8993216; doi:10.7554/eLife.72723)
Supplement: Figure 6—figure supplement 1—source data 1. [file elife-72723-fig6-figsupp1-data1.xlsx]

## Sheet: גיליון1
			Figure 6- supplement 1C											Figure 6- supplement 1I
			A.U			normalized to control mean									A.U			normalized to control mean
			control	RAR403		control	RAR403							NDP intensity	control	RAR403		control	RAR403
		Slit1 intensity	23.328	26.2826		0.696566	0.78479								0.406863	0.254902		1.31246	0.822264
			41.1771	17.8478		1.22954	0.532929								0.102941	0.27451		0.332068	0.885515
			29.5633	15.3394		0.882751	0.458029								0.22549	0.352941		0.727388	1.13852
			44.6609	16.178		1.33356	0.48307								0.181373	0.651961		0.585073	2.1031
			41.2794	23.6213		1.23259	0.705325								0.715686	0.254902		2.30867	0.822264
			31.58	15.9473		0.942968	0.47618								0.245098	0.485294		0.790639	1.56546
			35.4264	28.7815		1.05782	0.859407
			20.8664	21.9586		0.623064	0.655675
	control average		33.4852										control average		0.312908
			Figure 6- supplement 1F											Figure 6- supplement 1L
			A.U			normalized to control mean									A.U			normalized to control mean
			control	RAR403		control	RAR403								control	RAR403		control	RAR403
		Rspo1 intensity	68.512	66.3114		1.13732	1.10079							draxin intensity	35.0664	48.0162		0.77512	1.06137
			47.15	96.6969		0.782703	1.60519								72.3464	49.4467		1.59917	1.09299
			62.5785	72.082		1.03882	1.19658								59.1918	34.6045		1.3084	0.76491
			59.8595	73.6012		0.993683	1.2218								38.9657	47.2324		0.861311	1.04404
			59.56	73.2759		0.988712	1.2164								38.7182	57.0833		0.85584	1.26179
			60.4092	58.6913		1.00281	0.974292								32.0464	49.4883		0.708363	1.09391
			54.4906	64.6523		0.904558	1.07325								51.12	50.8075		1.12997	1.12307
			69.3231	48.7015		1.15078	0.808458								34.4909			0.762399
	control average		60.2353										control average		45.2432
			control	dnRAR

## Sheet: Raw Data fig6sup1C
control
21.34	55.45	26.84	27.41	41.58	34.4	41.78	19.69
19.99	54.67	21.19	36.99	43.54	36.45	31.99	22.27
21.87	38.59	27.05	39.23	45.1	20.24	33.17	22.2
23.77	31.25	32.22	51.22	47.71	26.42	37.13	20.57
24.15	39.34	20.91	45.89	51.2	33.29	38.31	18.13
25.48	45.81	33.31	33.81	41.1	37.14	39.66	19.7
21.76	43.97	29.11	31.83	37.51	30.85	42.53	18.64
20.12	40.65	27.47	47.9	33.89	33.85	30.37	20.58
25.02	47.63	31.34	56.8	49.29		32.18	20.93
21.49	35.56	28.4	63.54	47.93		25.03	20.42
21.1	36.35	26.54	56.65	43.58		37.54	19.19
21.24	36.38	28.35		35.97			23.26
29.2	30.2	39.88		37.04			21.64
27.81	40.63	35.33		35.26			24.91
25.58		27.12		31.28
		39.37		38.49
		29.8
		27.91
RARa403
21.95	20.43	14.59	15.57	16.36	17.62	33	21.77
25.98	28.01	10.2	12.25	20.48	12.32	29.31	21.3
26.63	33.94	15.68	18.57	25	17.4	24.01	22.35
24.55	20.9	12.58	17.65	29.57	24.56	29.32	17.74
27.52	12.68	19.16	13.83	25.04	24.63	29.1	15.83
21.1	13.87	11.78	20.41	23.17	13.32	30.74	19.77
26.04	17.19	16.72	17.85	20.29	16.02	30.02	16.84
31.98	14.68	17.26	17.32	24.03	12.12	33.28	23.73
28.72	15.58	21	14.81	22.2	11.09	31.19	25.28
32.45	11.78	12.92	19.7	27.75	8.41	29.29	24.55
29.74	13.77	16.35	17.27	21.59	17.93	24.66	27.71
29.98	17.67	17.6	8.61	30.09		23.02	25.87
29.63	14.89	11.11	15.32	25.83		27.22	19.19
27.93	15.18	13.98	18.53	20.69			25.49
24.14	24.28	18.15	14.98	22.23
21.09	16.54	16.35
22.09	11.68
19.32	18.19
28.53

## Sheet: Raw Data fig6sup1F
control
74.1	74.3	74.5	74.7	74.9	74.11	74.13	74.15
62.94	41.52	61.28	63.75	60.43	61.09	49.79	59.26
67.81	42.02	68.32	65.25	65.12	58.56	59.35	66.36
58.1	41.03	70.76	67.67	59.32	59.32	55.97	66
62.46	43.3	62.82	65.77	59.17	64.33	58.19	64.05
69.47	41.1	63.49	68.6	58.61	73.44	51.77	65.37
69.2	37.78	61.13	56.68	57.32	64.66	56.64	83.05
74.12	42.56	57.35	66.89	55.29	63.1	56.37	69.48
68.18	45.72	67.57	64.72	60.28	55.22	64.44	77.36
63.05	61.47	64.67	47.41	54.37	56.26	62.25	70.6
76.88	56.92	57.67	60.3	67.67	61.62	63.68	81.02
71.99	60.67	47.28	50.28	55.54	50.68	54.24	61.46
64.38	60.33	69.42	63.75	61.6	56.63	47.52	71.85
73.48	54.02	61.76	61.5			51.95	65.34
82.35	41.39		53.7			54.44
63.27	39.82		54.5			56.05
	44.75		56.02			51.46
			61.57			47.75
			54.58			38.97
			54.39
68.512	47.15	62.5785	59.8595	59.56	60.4092	54.4906	69.3231
RARa403
74.2	74.4	74.6	74.8	74.1	74.12	74.14	74.16
70.7	81.39	68.09	71.37	62.97	56.24	55.39	52.33
61.8	104.69	74.54	67.17	63.32	65.55	54.94	63.7
68.65	94.65	57.32	63	91.3	61.62	63.22	49.78
79.38	111.57	62.64	70.27	59.09	55.99	61.69	49.04
63.7	100	86.57	58.09	68.44	54.48	73.45	37.65
61.92	102.95	74.78	89	73.44	66.96	76.49	50.23
63.38	95.99	64.72	81.45	65.75	58.34	68.33	41.14
82.15	89.38	66.06	81.29	76.56	64.75	76.74	39.41
68.82	78.35	66.72	76.46	65.15	71	60.29	54.27
74.24	88.3	80.06	74.7	68.56	72.82	59.9	37.6
59.09	99.2	81.48	57.49	75.77	41.69	65.36	49.66
57.84	103.99	71.82	74.18	81.89	52.93	66.29	48.16
75.47	106.6	80.06	71.87	80.51	51.75	58.39	60.15
63.21		72.98	84.1	85.8	52.43
62.65		73.39	71.8	83.31	53.82
51.21			84.15	78.98
58.69			74.83	64.85
61.03
66.42
73.12
69.07
66.3114	96.6969	72.082	73.6012	73.2759	58.6913	64.6523	48.7015

## Sheet: Raw Data fig6sup1I
control
44.21	44.23	44.25	44.27	44.29	44.31
0.205882	0.147059	0.0882353	0.0882353	0.676471	0.264706
0.294118	0.117647	0.176471	0.0882353	0.764706	0.264706
0.441176	0.0882353	0.264706	0.117647	0.705882	0.0882353
0.323529	0.117647	0.205882	0.294118	0.764706	0.323529
0.588235	0.147059	0.235294	0.323529	0.764706	0.382353
0.588235	0	0.382353	0.176471	0.617647	0.147059
0.406863	0.102941	0.22549	0.181373	0.715686	0.245098
dnRAR
44.22	44.24	44.26	44.28	44.3	44.32
0.0588235	0.264706	0.352941	0.529412	0.411765	0.676471
0.117647	0.117647	0.588235	1	0.323529	0.735294
0.235294	0.176471	0.264706	0.588235	0.264706	0.323529
0.558824	0.382353	0.176471	0.5	0.117647	0.470588
0.205882	0.205882	0.294118	0.617647	0.264706	0.558824
0.352941	0.5	0.441176	0.676471	0.147059	0.147059
0.254902	0.27451	0.352941	0.651961	0.254902	0.485294

## Sheet: Raw Data fig6sup1L
control
43.41	75.2	66.04	42.13	38.5	27.04	48.19	33.29
44.67	79.56	58.7	42.04	34.37	31.61	50.13	30.29
37.84	76.57	54.62	38.85	29	30.89	53.62	37.37
22.1	61.55	57.17	34.7	40.53	32.7	53.5	43.27
37.42	71.7	62.95	33.67	39.57	37.31	51.51	31.02
34.78	74.99	56.53	32.17	38.15	34.58	57.07	32.74
36.76	82.01	56.27	41.94	36.3	32.82	51.13	35.49
34.12	78.74	59.85	31.71	39.88	27.39	47.77	30.25
38.46	70.11	60.87	41.48	39.17	38.84	43.39	31.86
28.96	64.03	56.01	38.25	48.43	28.46	45.63	42.06
33.89	61.35	62.1	45.1	42	30.87	56.25	31.76
40.21			42.64			55.25
32.77			45.6
25.54			35.24
35.0664	72.3464	59.1918	38.9657	38.7182	32.0464	51.12	34.4909
dnRAR
57.73	64.38	40.03	41.81	52.3	40.8	46.06
55.64	62.35	36.3	28.47	72.93	37.47	74.48
49.75	44.63	24.47	25.08	69.47	36.48	57.04
48.33	43.74	27.95	21.76	53.24	50.76	34.59
50.16	35.7	41.53	41.65	82.39	61.9	45.53
51.4	46.16	38.83	51.23	76.44	49.33	52.97
56.63	48.83	21.65	51.39	62.28	41.53	60.5
45.58	41.7	49.3	50.54	53.48	50.37	45.76
38.29	50.48	40.58	43.57	42.05	51.32	58.02
50.05	57.94	35.2	38.83	27.43	52.59	45.79
47.38	47.39	24.81	66.13	52.31	63.02	44.42
41.87	50.06		48.57	40.68	58.29	44.53
31.4			65.23
			57.59
			56.29
			55.14
			59.67
48.0162	49.4467	34.6045	47.2324	57.0833	49.4883	50.8075
