# Supplementary material for: Completion of neural crest cell production and emigration is regulated by retinoic-acid-dependent inhibition of BMP signaling
Source: eLife. 2022 Apr 8;11:e72723. doi: 10.7554/eLife.72723 (PMC8993216; doi:10.7554/eLife.72723)
Supplement: Figure 6—figure supplement 2—source data 1. [file elife-72723-fig6-figsupp2-data1.xlsx]

## Sheet: Sheet1
		A-E BAMBI
		control +	VP16 +	control -	VP16 -
		0.67	0.47	0.327103	0.534884
		0.54	0.48	0.455782	0.523077
		0.54	0.51	0.459119	0.491803
		0.67	0.47	0.330579	0.532374
		0.18	0.23	0.816794	0.766667
		0.11		0.894737
	F-J Rspo1
				control
				90.1	90.3	90.5	90.7	90.9	90.11	90.13	90.15
	# sections caudal to Rspo1			66	128	131	116	105	64	138	132
	total # sections			320	316	324	315	338	344	312	308
	fraction			0.20625	0.405063	0.404321	0.368254	0.310651	0.186047	0.442308	0.428571
				VP16-RAR
				90.2	90.4	90.6	90.8	90.1	90.12	90.14
	# sections caudal to Rspo1			120	132	85	130	182	146	147
	total # sections			320	360	320	350	315	305	345
	fraction			0.375	0.366667	0.265625	0.371429	0.577778	0.478689	0.426087

## Sheet: Raw Data A-E
			+	-	sum					+	-
	control	87.15	72	35	107			control	87.15	0.672897	0.327103
		87.13	80	67	147				87.13	0.544218	0.455782
		87.9	86	73	159				87.9	0.540881	0.459119
		87.3	81	40	121				87.3	0.669421	0.330579
		87.11	24	107	131				87.11	0.183206	0.816794
		87.5	18	153	171				87.5	0.105263	0.894737
	VP16	87.12	80	92	172					0.452648	0.547352
		87.2	62	68	130
		87.4	62	60	122
		87.6	65	74	139			VP16	87.12	0.465116	0.534884
		87.1	28	92	120				87.2	0.476923	0.523077
									87.4	0.508197	0.491803
									87.6	0.467626	0.532374
									87.1	0.233333	0.766667
										0.430239	0.569761
