# Supplementary material for: Completion of neural crest cell production and emigration is regulated by retinoic-acid-dependent inhibition of BMP signaling
Source: eLife. 2022 Apr 8;11:e72723. doi: 10.7554/eLife.72723 (PMC8993216; doi:10.7554/eLife.72723)
Supplement: Figure 6—source data 1. [file elife-72723-fig6-data1.xlsx]

## Sheet: גיליון1
		Figure 6H					Figure 6I
			control	RAR403				control	RAR403
		SNAI2+Rspo1+ cells/section	0.92	3.08			Sox9+Rspo1+ cells/section	1.46	8.43
			0	1.92				1.33	9.25
			0.42	3.58				1.73	6.5
			0.18	3.67				2	5.9
			0.25	3.83				0.29	4.22
			0.17	2.59				0.67	4.56
			0.25	5.15				1.2	8.25
			0.25	3.92				0.6	5.92
			1					1.1	8
									9.1

## Sheet: Raw Data Fig6H
control
SNAI2+	SNAI2+Rspo1+	SNAI2+	SNAI2+Rspo1+	SNAI2+	SNAI2+Rspo1+	SNAI2+	SNAI2+Rspo1+	SNAI2+	SNAI2+Rspo1+	SNAI2+	SNAI2+Rspo1+	SNAI2+	SNAI2+Rspo1+	SNAI2+	SNAI2+Rspo1+	SNAI2+	SNAI2+Rspo1+
1	1	0	0	0	0	0	0	0	0	0	0	0	0	0	0	0	0
1	1	0	0	0	0	0	0	1	1	0	0	1	1	3	3	0	0
0	0	0	0	1	1	0	0	1	1	0	0	0	0	0	0	2	1
1	1	0	0	0	0	0	0	1	0	1	1	0	0	1	0	0	0
1	0	0	0	0	0	1	1	2	1	0	0	2	1	0	0	1	1
2	0	0	0	0	0	1	0	0	0	0	0	0	0	0	0	0	0
2	2	0	0	1	1	1	0	0	0	0	0	0	0	0	0	0	0
0	0	0	0	3	2	0	0	0	0	0	0	1	1	0	0	3	3
0	0	0	0	1	1	2	1	0	0	0	0	0	0	0	0	2	2
2	2	0	0	0	0	0	0	0	0	0	0	0	0	0	0	3	3
1	1	0	0	0	0	0	0	1	0	0	0	0	0	0	0
3	3	0	0	0	0			0	0	1	1	0	0	0	0
	0.916667		0		0.416667		0.181818		0.25		0.166667		0.25		0.25		1
dnRAR
SNAI2+	SNAI2+Rspo1+	SNAI2+	SNAI2+Rspo1+	SNAI2+	SNAI2+Rspo1+	SNAI2+	SNAI2+Rspo1+	SNAI2+	SNAI2+Rspo1+	SNAI2+	SNAI2+Rspo1+	SNAI2+	SNAI2+Rspo1+	SNAI2+	SNAI2+Rspo1+
2	2	4	4	2	2	2	2	4	2	7	6	2	2	4	4
3	3	1	1	0	0	4	3	5	4	6	5	2	2	4	4
4	4	2	2	1	1	3	3	3	3	2	2	3	3	3	3
4	3	1	1	3	3	4	4	9	9	4	4	8	8	2	2
4	3	5	4	3	3	11	10	8	7	2	2	6	6	9	9
1	1	1	1	7	7	4	4	5	5	3	3	5	5	5	5
9	8	2	2	2	2	4	4	2	2	4	4	4	4	6	5
5	5	0	0	2	2	2	2	5	3	1	1	6	6	5	5
3	3	3	3	7	6	3	3	3	1	0	0	11	11	4	4
1	1	4	4	6	6	3	2	4	3	3	3	7	5	3	3
0	0	1	0	3	3	5	5	3	3	2	2	4	4	1	1
4	4	1	1	8	8	2	2	4	4	2	2	5	5	2	2
										1	1	8	6
										2	2
										3	3
										1	1
										4	3
	3.08333		1.91667		3.58333		3.66667		3.83333		2.58824		5.15385		3.91667

## Sheet: Raw Data Fig6I
control										RARa403
66.17	66.15	66.13	66.11	66.9	66.7	66.5	66.3	66.1		66.2	66.18	66.16	66.14	66.12	66.1	66.8	66.6	66.4	66.2
0	0	5	2	0	0	2	0	0		7	11	6	8	5	6	6	2	9	4
3	3	0	1	0	2	2	2	2		9	14	4	5	5	11	9	4	7	8
0	0	0	4	1	0	0	0	0		9	9	6	6	5	5	11	7	10	2
0	1	0	2	0	0	0	0	1		7	12	8	9	1	1	8	5	10	13
3	2	3	2	1	3	1	0	2		11	5	6	2	5	3	12	4	9	7
1	3	2	0	0	0	2	1	1		10	7	8	5	4	4	6	9	6	14
2	3	0	3	0	0	1	3	3		6	8	8	9	3	5	7	8	8	10
1	0	1	4		0	0	0	0			8	9	4	3	6	7	5	7	12
0	0	4	1		1	3	0	1				5	6	7	0		7	6	11
1		2	1			1	0	1				4	5				5		10
3		2										6					7
2												8					6
3																	8
1.46154	1.33333	1.72727	2	0.285714	0.666667	1.2	0.6	1.1		8.42857	9.25	6.5	5.9	4.22222	4.55556	8.25	5.92308	8	9.1
