# Supplementary material for: Completion of neural crest cell production and emigration is regulated by retinoic-acid-dependent inhibition of BMP signaling
Source: eLife. 2022 Apr 8;11:e72723. doi: 10.7554/eLife.72723 (PMC8993216; doi:10.7554/eLife.72723)
Supplement: Figure 7—figure supplement 1—source data 1. [file elife-72723-fig7-figsupp1-data1.xlsx]

## Sheet: גיליון3
						control	RARa403
					Pax7+/total NT area	0.283675	0.350152
						0.271285	0.301978		HB9+ area (trunk EP/limb non-EP)	control	RARa403
						0.273953	0.307438			1.03002	1.10688
						0.248334	0.254391			1.24215	0.980808
						0.262806	0.31989			0.927971	1.04615
						0.250629	0.257331			1.24366	1.19709
							0.296122			1.25986	0.777269
										1.19199	1.34414
										0.905783	0.918346
						0.265114	0.298186
										1.11449	1.05295

## Sheet: Raw Data Pax7
control
	Pax7+ area	NT area	Pax7+/NT area		area	NT area	area/NT		area	NT area	area/NT		area	NT area	area/NT		area	NT area	area/NT		area	NT area	area/NT
	10334.8	36217.5	0.285355		6129.05	22290.6	0.274961		13171.5	51800.8	0.254273		12522	50902.9	0.245999		13044.6	50757.9	0.256997		11431.8	45827.6	0.249453
	9737.12	35799.6	0.27199		5935.09	21817.2	0.272037		12880.5	50232.7	0.256417		11846.2	50816.7	0.233117		13216.5	48651.3	0.271657		11339.3	47230.8	0.240083
	10047.7	35430.7	0.283587		6144.48	22081.9	0.278259		12894.9	48059.2	0.268312		12421.3	50488.6	0.246022		13549.9	48885.7	0.277174		11171.7	45208.2	0.247117
	9894.87	34046.5	0.290628		5441.53	22948	0.237124		13512.7	49830	0.271177		13063.6	47860	0.272954		12802.4	51118	0.250447		11517.8	44784.4	0.257183
	9187.12	34467.3	0.266546		5788.31	21585	0.268163		13409.5	49024.1	0.27353		12308.4	48782.1	0.252314		12990	49812.7	0.260778		11757	46271.6	0.254087
	9292.57	32535.4	0.285614		5889.07	22574	0.260879		13130	47424.6	0.276861		12196.4	47937.2	0.254425		13351.8	50569.7	0.264029		11759.3	46883.6	0.250819
	9293.49	33027.2	0.281389		6027.1	21725.6	0.277419		12672.6	45740.7	0.277054		12461.1	51960.9	0.239817		13077.7	49936	0.261889		12271.9	47331.3	0.259276
	9457.82	31723.3	0.298135		5816.65	21645.1	0.268728		13665.5	45052.7	0.303322		12652.1	50882.6	0.248654		12754.4	48352.5	0.263779		11567.6	46085.4	0.251004
	9091.47	31650.5	0.287246		5997.96	20692.4	0.289863		13204.9	46463	0.284203		12009.1	50589.2	0.237385		13839.7	50873.9	0.27204		12271.5	49027.4	0.250299
	9291.22	32456.7	0.286265		5772.06	20223	0.285421		13353.4	48667.2	0.274382		12588.2	49823.5	0.252655		12207.7	48973.8	0.24927		12209.9	49439.3	0.246967
average trunk	9562.82		0.283675		5894.13		0.271285		13189.6		0.273953		12406.8		0.248334		13083.5		0.262806		11729.8		0.250629
RARa403
	area	NT area	area/NT		area	NT area	area/NT		area	NT area	area/NT		area	NT area	area/NT		area	NT area	area/NT		area	NT area	area/NT		area	NT area	area/NT
	10680.8	30262.9	0.352935		14631	47944.2	0.305169		13781.2	47357	0.291007		11387.9	45058.5	0.252736		13160	42244.9	0.311517		13955.4	55441.8	0.251713		13351.1	43453.3	0.307251
	10617	31338.4	0.338786		14109.3	45525.7	0.309919		15239.8	46570.9	0.327238		11446.1	45124	0.25366		12857.2	40139.6	0.320311		13572.3	56203	0.241488		12936.9	42764.6	0.302515
	10612.9	31090.2	0.341357		14517.7	47847.8	0.303415		13953	44569.8	0.31306		11928.1	44454.1	0.268325		12531	40289.4	0.311025		13613.6	56344.2	0.241615		12324.1	46146.4	0.267065
	11061.5	29684.1	0.37264		13720.9	48444.8	0.283227		14976.9	45675.5	0.327897		10678.8	44110.4	0.242091		12395.1	38714.5	0.320166		13258.5	53681.8	0.246983		12389.9	47003.4	0.263596
	10727.2	30334.5	0.35363		14293	45734	0.312526		13927.9	44693.4	0.311631		11438.4	43957.2	0.260217		12368.2	39865.6	0.310249		13339.4	54318.7	0.245576		12646.4	43190.8	0.292803
	10774.7	30625.3	0.351823		12898.1	44811.8	0.287829		13826.3	45875.5	0.301388		10036	44562.1	0.225213		12353.8	36820.6	0.335514		13354.8	54762.7	0.243866		11966.2	41747.8	0.28663
	10404.9	29504.8	0.35265		13501.6	43862.9	0.307813		14269	45003.6	0.317064		11114.7	44429	0.250167		12085.6	36666.9	0.329605		13514.7	54600.4	0.24752		12991.3	41743.6	0.311218
	10674.3	29907.2	0.356915		14145.9	48122.5	0.293955		14075	47482.7	0.296423		11384.6	42954.8	0.265036		12039	37471.7	0.321282		13518.3	56462.1	0.239423		12746.7	44865.6	0.284108
	10619.8	30102.1	0.352792		13715.1	46500	0.294948		13879.4	45650.7	0.304035		10962.3	42249	0.25947		11727.9	36424.4	0.321978		13276.7	56657.2	0.234334		13112.5	42461.3	0.30881
	10206.9	31118.9	0.327995		14042.9	43750.6	0.320976		14016.5	49242.6	0.284642		11245	42116.9	0.266995		11303.5	35629.1	0.317254		12905.3	52294.7	0.24678		12889.6	43124.9	0.298889
																					14283.9	49247.3	0.290045		12898.6	41753.4	0.308923
																					13836.3	48659.1	0.284352		12692.9	44432.2	0.285669
average trunk	10638		0.350152		13957.6		0.301978		14194.5		0.307438		11162.2		0.254391		12282.1		0.31989		14286.9	50484.8	0.282994		13875.4	44556.6	0.31141
																					14351.9	51530.4	0.278513		13742.2	43374.9	0.316823
																					13392	49880.1	0.268484
																					14348.7	52297.4	0.274368		12897.4		0.296122
																					13238.3	51597.4	0.256569
																					13649.8		0.257331

## Sheet: Raw Data HB9
control		limb - upper limb, non EP. Trunk - first 10 sections below upper limb, EP
	92.1		92.3		92.5		92.7		92.9		92.11		92.13
trunk	3596.8		2981.35		3371.73		3924.86		2672.13		2344.27		2757.77
	3503.42		3103.05		2426.35		3808.81		2787.58		2381.7		4483.1
	2974.43		3300.39		2803.08		2725.57		3371.71		2336.34		1152.78
	3433.41		3295.1		2651.33		2503.91		4459.3		2666.66		1684.32
	2784.86		3049.48		2869.11		2589.55		2489.76		2378.64		1466.55		trunk/limb area			average trunk area
	3343.05		2929.3		2636.33		3088.08		2986.69		2574.78		1205.86
	3151.13		3440.16		2422.77		2317.05		3248.77		2792		1556.99		control	RARa403		control	RARa403
	2698.71		2934.38		2650.77		2530.99		2663.27		2680.14		2454.8		1.03002	1.10688		3144.39	2740.86
	3111.02		3124.68		1980.88		2775.6		2541.32		2257.9		1740.21		1.24215	0.980808		3137.08	3749.89
	2847.07		3212.95		2202.53		2451.63		2572		2676.35		1976.96		0.927971	1.04615		2601.49	3180.12
limb	3505.8		2454.41		2267.4		2977.86		2029.33		1858.75		1403.33		1.24366	1.19709		2871.61	2883.13
	3035.67		2602.29		2793.14		1931.96		2434.33		1855.97		2938.24		1.25986	0.777269		2979.25	1756.58
	3293.62		2521.36		2479.8		2472.98		1875.11		1984.89		1977		1.19199	1.34414		2508.88	2065.1
	2941.99		2684.95		2944.24		2215.61		2888.66		2115.27		2509.21		0.905783	0.918346		2047.93	2609.66
	2486.66		2364.64		3532.49		1946.6		2596.28		2709.06		2476.99
															1.11449	1.05295		2755.8	2712.19
average trunk	3144.39		3137.08		2601.49		2871.61		2979.25		2508.88		2047.93
average limb	3052.75		2525.53		2803.41		2309		2364.74		2104.79		2260.95
trunk/limb ratio	1.03002		1.24215		0.927971		1.24366		1.25986		1.19199		0.905783
RARa403
	92.2		92.4		92.6		92.8		92.1		92.12		92.14
trunk	2308		3847.82		3078.42		5031.62		2277.05		2641.19		1947.57
	2614.89		3378.72		2050.31		3289.31		2068.6		2221.76		2378.79
	3672.36		4042.38		3098.93		2646.53		1764.71		2104.01		2824.99
	1739.95		3748.95		3696.89		3058.14		1705.07		2010.1		2660.51
	2937.68		3282.17		3230.68		2334.28		1321.7		1928.34		2413.21
	2449.74		4361.55		3511.42		2114.88		1373.64		1601.62		2326.29
	2623.96		3439.71		3868.08		2954.47		1841.2		1847.86		3097.82
	3439.02		3967.2		2834.44		2865.06		1288.47		2453.02		3240.73
	2503.48		4347.25		3014.47		2308.84		1975.24		1870.76		2820.45
	3119.49		3083.15		3417.52		2228.19		1950.1		1972.3		2386.29
limb	2226.61		3642.03		3045.53		2522.65		2017.21		1176.27		2409.2
	2027.93		4190.53		2483.35		1708.03		2070.44		1761.41		2856.76
	2678.21		4127.78		2873.46		3055.99		2392.74		1379.54		3610.47
	3127.33		3374.99		3232.61		2510		2406.27		1287.68		2305
	2320.93		3781		3564.17		2245.62		2413.02		2076.94		3027.07
average trunk	2740.86		3749.89		3180.12		2883.13		1756.58		2065.1		2609.66
average limb	2476.2		3823.27		3039.82		2408.46		2259.94		1536.37		2841.7
	1.10688		0.980808		1.04615		1.19709		0.777269		1.34414		0.918346
