# Supplementary material for: Completion of neural crest cell production and emigration is regulated by retinoic-acid-dependent inhibition of BMP signaling
Source: eLife. 2022 Apr 8;11:e72723. doi: 10.7554/eLife.72723 (PMC8993216; doi:10.7554/eLife.72723)
Supplement: Figure 7—source data 1. [file elife-72723-fig7-data1.xlsx]

## Sheet: גיליון1
		Figure 7A
			control	RAR403
		BarHL1+ cells/section	44.3	52.2
			54.9	37.9
			39.7	51.7
			57.2	29.1
			32.3	42.2
			33.1	36.2
			58	35
			37	34.9
			52.1

## Sheet: Raw Data Fig7B-C
control	embryo1													embryo2													embryo3													embryo4
	section1	section2	section3	section4	section5	section6	section7	section8	section9	section10	section11	section12		section1	section2	section3	section4	section5	section6	section7	section8	section9	section10	section11	section12		section1	section2	section3	section4	section5	section6	section7	section8	section9	section10	section11	section12		section1	section2	section3	section4	section5	section6	section7	section8	section9	section10
Distance of a BarHL1+ cells from the dorsal midline	58	26	52	56	30	40	36	45	58	56	49	48		48	45	44	39	41	36	60	50	38	44	30	36		39	31	46	27	26	39	36	32	26	26	28	24		53	51	53	55	50	51	55	40	57	49
	47	55	48	57	51	44	53	61	57	56	47	53		52	56	58	34	43	43	66	58	47	53	35	47		56	32	49	26	27	44	32	40	37	43	33	34		49	55	56	57	57	54	54	52	63	51
	64	56	58	64	56	54	57	64	66	71	60	58		57	54	65	40	44	49	71	65	55	53	47	55		58	38	50	29	37	52	38	57	43	51	42	39		55	60	59	57	60	63	61	58	62	50
	73	59	62	69	56	50	47	58	63	62	65	66		62	56	60	47	49	54	69	73	57	62	52	55		56	39	60	31	46	53	44	59	53	58	45	47		58	71	59	65	66	69	60	64	67	54
	67	65	66	75	56	55	59	63	64	68	62	61		55	61	67	50	53	65	64	66	60	62	57	64		62	44	58	32	43	59	50	64	58	55	50	57		59	66	66	66	72	72	67	67	72	55
	74	69	61	69	60	64	64	69	70	74	71	64		54	66	64	48	50	72	68	68	67	67	63	61		62	47	56	38	52	63	43	71	56	59	54	52		61	66	65	68	66	76	66	69	76	56
	76	67	67	78	64	62	69	74	67	75	67	69		59	66	65	54	48	70	63	73	66	66	65	64		67	55	66	47	58	69	56	77	54	66	53	58		65	73	70	72	67	84	71	69	71	59
	69	70	70	80	68	59	68	66	72	78	78	73		65	63	70	61	60	67	70	78	59	72	64	69		69	52	70	46	53	71	55	75	52	69	57	56		70	74	69	74	72	82	69	72	80	61
	81	74	73	88	66	67	81	74	73	83	80	76		70	66	72	57	60	64	74	79	64	73	69	69		72	51	76	45	54	69	67	72	62	64	59	59		72	78	70	76	76	82	75	76	86	59
	80	75	77	83	69	71	75	79	75	82	85	78		71	71	78	65	62	60	77	77	69	70	69	70		77	56	80	39	60	76	68	85	68	71	56	65		77	76	76	80	82	86	73	80	83	64
	81	80	84	87	71	71	75	76	78	81	86	81		76	76	78	65	68	74	75	72	72	70	68	76		81	57	85	42	65	73	74	85	67	76	58	60		80	78	77	79	88	89	77	83	79	65
	87	77	72	91	76	70	76	81	80	87	88	80		80	79	73	58	68	71	81	81	71	76	78	74		77	61	76	51	64	81	74	81	73	70	66	65		79	82	77	82	83	93	84	89	79	66
	86	79	78	86	77	65	82	87	85	85	94	87		71	81	77	71	64	76	81	86	72	80	74	81		74	65	85	56	69	79	78	33	80	76	66	64		84	84	81	84	78	94	81	87	84	64
	92	85	82	95	75	77	87	86	85	88	92	86		69	76	81	75	68	79	80	88	76	81	65	81		85	69	89	55	71	84	77	36	78	82	68	70		88	90	83	86	84	99	83	91	87	66
	91	85	84	103	83	77	84	85	90	91	95	88		71	74	87	72	69	78	85	85	78	82	69	77		82	72	83	60	75	87	81	42	86	87	72	74		88	93	90	93	91	102	87	99	98	68
	89	83	91	106	84	78	94	89	82	93	100	91		80	79	87	71	69	75	87	91	82	82	73	84		87	82	92	58	78	92	84	44	86	91	77	68		95	92	88	95	89	101	87	101	101	69
	92	88	93	101	91	85	101	92	85	91	108	97		86	81	82	76	75	81	91	95	86	86	78	87		40	42	87	62	72	98	94	45	18	95	70	70		98	88	92	90	94	97	91	106	101	70
	91	98	95	67	92	89	93	96	88	101	110	96		85	85	87	80	74	84	91	98	84	90	77	88		46	44	94	67	80	47	26	49	31	105	73	75		103	96	99	90	101	102	92	115	97	70
	90	91	98	67	94	99	56	91	95	97	106	105		91	89	91	81	82	92	102	103	79	92	83	92		53	49	24	66	84	53	37	61	38	108	77	82		102	103	93	96	100	107	94	120	95	76
	98	94	101	73	97	46	59	94	91	106	116	34		96	93	91	86	82	90	104	107	87	95	88	96		58	51	38	70	88	56	48	66	44	110	85	87		97	102	94	102	106	154	98	112	99	77
	103	103	106	75	44	48	62	98	93	37	44	45		100	98	94	79	87	98	111	110	90	101	92	103		54	57	36	74	29	54	50	64	43	16	89	24		107	101	99	107	108	39	104	121	105	80
	99	109	105	76	46	62	71	107	95	40	41	53		96	91	99	86	92	102	104	105	95	95	98	107		56	62	40	79	44	58	55	63	48	18	96	41		97	108	102	115	112	53	104	124	108	77
	95	54	108	76	55	66	78	50	101	43	52	57		100	88	98	91	89	104	109	30	91	88	88	49		59	57	47	73	51	61	47	58	47	20	23	42		108	109	106	104	117	63	115	124	107	83
	105	56	53	71	60	63	78	58	101	47	59	61		94	90	102	95	85	102	99	43	97	95	85	51		62	63	53	78	53	67	46	61	47	26	26	45		127	113	109	106	123	70	117	154	114	88
	31	63	59	81	56	72	72	64	106	55	58	60		106	95	105	98	80	110	108	53	101	99	94	57		65	68	49	85	56	62	61	68	54	28	37	50		23	113	107	112	57	76	119	48	115	90
	25	63	56	85	60	69	76	58	102	60	62	57		112	99	93	95	96	115	59	59	95	106	106	64		70	65	45	92	59	69	62	68	53	35	33	55		40	111	104	114	52	75	124	60	120	96
	35	68	65	83	65	73	86	71	102	60	66	53		120	102	86	100	99	47	69	55	100	110	107	71		74	64	43	20	57	75	73	69	53	45	41	50		42	141	111	122	59	81	115	64	126	91
	48	73	70	89	69	70	84	81	48	60	68	67		125	105	97	89	101	59	65	65	103	108	35	73		70	62	46	25	63	80	70	73	55	46	53	58		60	32	128	139	60	85	118	62	114	99
	48	73	51	92	64	75	91	79	54	63	73	69		44	103	114	93	93	65	70	72	101	104	35	80		80	59	50	30	66	86	67	75	58	46	52	61		56	40	133	48	59	88	129	66	123	104
	45	71	65	90	68	81	95	73	57	63	70	74		51	99	118	92	93	63	75	73	105	105	32	82		77	65	54	42	62	81	75	74	57	47	46	63		53	40	135	51	63	89	125	72	125	104
	51	77	65	94	73	80	98	78	59	67	76	76		58	101	41	97	87	71	73	72	95	111	43	84		85	68	54	49	61	75	76	80	62	52	53	60		50	51	44	56	66	88	31	76	123	99
	64	80	75	90	77	87	104	86	65	71	81	74		57	104	48	96	84	68	82	71	116	119	45	86		83	70	58	46	58	79	82	83	66	55	59	63		55	48	45	54	64	91	48	80	45	92
	60	84	71	84	78	88	106	85	71	76	79	81		59	107	58	104	93	70	82	79	99	45	51	90		78	74	59	46	65	83	87	87	62	59	59	69		58	59	48	62	70	93	53	74	47	95
	59	86	73	105	84	86		88	68	70	84	84		64	110	67	109	98	80	88	76	48	54	56	96		83	77	63	49	65	87	94	85	84	57	59	67		64	62	52	62	72	98	57	78	53	102
	58	91	78	111	81	85		88	68	71	85	86		63	104	72	118	97	85	87	83	54	56	58	93		89	74	67	52	67	89		100	73	53	64	71		71	59	60	68	75	99	59	82	59	103
	65	89	78	122	85	84		98	70	77	84	91		64	45	74	38	98	86	92	83	60	60	57	101			73	72	52	73	92			78	52	68	79		69	67	64	68	78	104	60	90	62	118
	73	97	82	131	90	83		101	76	77	89	91		69	42	67	42	89	88	81	80	62	70	51	101			92	76	56	73					57	67	74		62	72	63	72	78	101	64	94	66	45
	75	101	85		83	82		103	74	80	92	90		68	41	62	55	88	93	96	90	66	66	57	106				64	61	72					58	60	81		67	70	69	76	83	106	67	100	67	50
	82	101	81		86	82		108	80	83	91	94		75	58	72	52	100	98	98	89	70	73	58	102					58	79					64	67	91		63	77	73	74	87	106	69	104	67	52
	79	111	90		90	82		109	79	86	92	92		77	60	77	62	111	102	106	95	67	70	63	112					60	81					62	67			74	76	73	77	81	110	66	97	71	52
	75		92		92	82		112	85	90	96	86		73	63	81	57	24	97	110	100	74	76	64	115					63	79					62	72			75	77	75	82	85	112	75	102	77	56
	79		93		101	86			86	92	97	97		74	67	89	68	29	102	109	100	78	77	68						79	87					67	73			73	83	80	82	92	117	75	87	75	59
	82		99			83			83	89	99	99		79	69	88	69	35	102	102	98	82	80	70						65						68	81			78	83	85	89	92	106	77	89	74	62
	89		100			92			86	103	100	105		82	65	86	66	38	111		104	81	79	68						65						71	85			87	83	88	94	96	102	79	91	80	67
	98		106			97			91	103	106	104		83	73	98	74	48	111		107	87	83	78						71						76	97			88	89	95	88	100	107	84	105	85	67
	96		118			95			98	127	108	103		82	75	107	72	44	109		105	88	82	74						70						83	100			89	101	94	92	98	109	87	107	86	72
	88					95			100		103	118		84	77	104	77	53	118		100	91	86	73						70										89	98	88	88	96	116	88	107	91	72
	91								99		104			87	73	101	81	57				99	92	73						72										82	100	98	101	97	114	84	108	96	78
	92								107		103			91	72	118	77	57				96	87	77						77										95	103	103	104	101	118	86	114	96	73
	96								111					91	73		79	63				95	91	78						81										100	104	107	104	104	120	89		93	69
	100													88	79		85	64				107	92	81						84										102	106	102	98	105	118	93		97	79
	99													97	84		90	61				103	96	85						90										101	104	98	102	109		94		102	82
	102													105	85		90	65				107	99	85																103	98	99	108	112		99		102	89
														103	84		85	70				105	102	84																106	100	104	98	114		103			87
															84		87	69				102	102	80																	103	109	105	109		99			80
															90		92	70				103	97	80																		105	110	114		104			81
															91		92	74				107	104	75																		102	110	108		103			79
															89		98	79				113		76																		103	116	105		107			82
															94		103	77						85																		106	147	114		110			85
															98		104	83						94																		108		112		105			88
															104		109	88						96																		115		116		109			88
															98		92	91																								120		119		127			88
															95			91																										124					92
															104			95																															94
															108			96																															98
															107			99																															95
															112			102																															95
															102			102																															100
															107			107																															99
															111																																		99
															117																																		102
																																																	110
number of BarHL1+ cells per section
	53	40	46	37	42	47	33	41	50	46	49	47		54	71	49	62	69	47	43	47	58	57	61	41		35	37	38	52	42	36	34	35	36	46	46	39		54	55	62	59	63	51	62	49	53	72
average number per section per embryo	44.25													54.9167													39.6667													57.1667
RARa403	embryo1															embryo2													embryo3													embryo4
	section1	section2	section3	section4	section5	section6	section7	section8	section9	section10	section11	section12	section13	section14		section1	section2	section3	section4	section5	section6	section7	section8	section9	section10	section11	section12		section1	section2	section3	section4	section5	section6	section7	section8	section9	section10	section11	section12		section1	section2	section3	section4	section5	section6	section7	section8
	40	7	24	18	43	38	21	20	36	57	10	14	5	22		20	19	20	16	16	31	26	32	41	53	36	32		23	19	36	19	24	18	27	25	15	12	24	49		34	36	13	28	17	19	6	30
	29	21	28	22	54	39	27	27	39	56	35	36	18	35		31	36	40	24	36	38	35	39	43	52	54	48		34	32	38	29	29	32	28	28	27	38	35	58		43	58	31	22	14	31	13	34
	40	32	39	48	57	43	28	36	44	63	56	39	27	37		38	46	44	39	58	54	34	42	54	57	48	49		36	42	52	36	35	38	47	35	36	42	55	66		51	50	40	51	29	27	13	39
	47	40	47	45	62	48	35	27	51	61	55	38	44	38		47	51	44	41	60	56	46	55	54	60	66	54		44	44	64	34	37	43	53	35	40	52	61	62		61	65	47	55	26	23	23	75
	42	46	43	48	70	52	39	37	50	50	61	46	49	43		57	54	48	50	65	55	60	61	59	66	63	51		44	45	58	41	44	42	54	39	37	51	52	71		68	62	63	59	30	36	26	80
	47	41	40	50	62	54	42	43	53	63	70	53	54	47		62	57	53	57	72	62	56	68	61	65	62	59		51	49	66	50	45	45	54	42	43	47	51	75		77	70	68	64	35	37	37	79
	46	43	45	47	75	58	47	47	54	69	70	49	59	51		72	63	52	59	78	67	55	74	63	70	61	65		54	52	67	57	51	49	63	44	38	53	59	72		81	76	68	74	40	47	57	86
	53	48	50	53	72	57	52	50	64	70	73	48	62	59		69	67	59	60	84	63	61	66	66	76	69	70		51	47	67	55	49	54	58	42	40	58	61	79		86	85	74	64	50	36	71	104
	53	51	55	60	72	55	48	56	61	74	85	55	47	58		74	64	61	63	90	69	67	75	64	78	68	70		50	54	73	55	51	60	60	49	47	56	65	76		90	91	76	79	54	52	72	109
	59	49	54	64	70	59	50	62	64	75	85	60	70	60		81	73	62	62	106	72	67	78	70	85	70	76		52	61	78	62	58	62	66	56	48	59	69	82		122	97	79	83	57	58	79	112
	57	54	60	62	80	58	56	59	68	80	88	65	70	55		83	72	73	65	37	73	74	82	75	88	73	88		55	64	75	66	59	71	72	51	43	64	69	89		14	96	89	86	55	62	82	129
	60	57	59	71	83	67	62	61	72	77	98	62	79	63		74	77	79	71	40	80	68	88	72	87	79	90		58	63	67	65	60	69	77	48	47	67	71	88		25	109	100	91	62	68	94	142
	63	63	61	67	87	67	67	66	75	73	93	66	73	67		80	74	91	67	48	80	73	93	72	87	80	47		61	69	83	61	64	74	76	55	52	67	76	95		32	104	18	121	66	67	101	144
	70	62	64	71	86	72	66	55	78	76	102	67	79	73		85	80	104	72	51	75	78	104	80	99	83	51		65	71	94	66	66	82	81	57	58	73	81	99		43	8	39	21	72	74	106	19
	67	70	69	77	94	78	58	43	82	82	95	74	91	72		84	87	10	78	60	79	80	110	85	95	90	47		69	79	98	70	66	72	85	64	58	77	84	105		59	49	50	22	69	89	121	21
	64	76	75	76	96	74	63	60	84	83	96	73	104	67		89	90	37	82	66	83	82	119	80	102	80	58		63	75	103	72	72	67	83	64	55	77	76	103		54	52	57	30	77	99	121	39
	68	70	71	76	92	71	72	66	85	85	110	77	90	70		92	32	42	85	67	78	90	28	91	105	92	64		56	83	109	73	78	68	90	69	68	84	85	112		52	59	62	32	91	110	35	51
	71	83	73	82	88	84	70	65	83	87	104	83	93	70		97	37	53	96	62	91	93	39	93	103	99	65		62	84	135	80	83	75	92	74	85	90	88	113		72	64	55	38	89	35	40	56
	76	81	90	82	101	80	73	69	75	93	26	101	96	77		100	44	46	27	71	96	94	38	95	43	110	74		65	87	9	85	89	77	95	78	88	75	97	113		82	60	57	42	90	42	51	56
	74	84	95	88	97	84	79	70	90	99	37	106	103	84		27	60	52	41	72	102	101	38	103	47	25	76		64	91	31	90	92	86	114	79	96	107	89	119		88	69	74	51	126	45	55	52
	86	94	104	89	94	88	86	74	93	90	37	113	27	83		41	51	68	52	77	108	33	43	106	51	34	72		70	92	38	98	101	94	96	79	107	124	85	120		91	76	80	63	31	43	61	63
	99	93	103	83	107	88	85	76	91	104	46	115	33	95		46	58	70	58	82	116	36	51	111	58	43	80		71	94	30	102	100	87	120	85	98	117	91	127		113	73	78	91	39	66	62	72
	103	101	114	87	101	99	76	81	97	106	49	115	34	90		49	56	74	65	81	18	42	52	120	58	44	83		71	101	36	109	107	93	122	93	115	31	96	129		126	73	70	97	38	68	67	75
	97	107	22	88	108	103	88	85	104	97	45	111	37	45		54	54	79	63	85	41	42	58	39	68	49	87		75	114	41	112	111	98	125	105	120	38	92	140		129	68	82		46	74	68	80
	102	111	26	93	117	128	93	81	111	106	58	110	43	47		52	66	85	62		50	51	58	38	58	52	91		77	126	48	118	112	103	127	99	50	45	103	40		136	84	83		51	77	78	87
	107	108	32	95	28	17	91	81	105	115	54	118	55	51		57	64	77	70		48	50	64	50	64	59	87		76	129	56	112	116	96	20	101	53	45	107	58		134	96	77		54	85	81	91
	117	111	35	97	24	31	85	79	102	120	56	27	65	55		61	64	89	71		53	60	71	59	71	54	93		80	31	50	117	126	104	27	110	34	50	46	64				84		55	93	86	87
	7	116	34	103	40	29	94	87	115	107	56	35	70	61		63	70	88	77		56	64	72	58	71	49	100		89	39	62	117	13	108	47	112	70	55	46	71				90		59	120	95	96
	20	118	42	104	40	32	11	86	117	118	52	43	78	60		74	72	94	76		61	69	69	72	68	59	106		90	51	60	115	28	107	49	36	76	54	52	77						58		99	100
	32	119	46	98	45	48	16	91	111	121	63	49	59	60		72	69	97	80		66	69	77	70	73	62	110		88	45	65	119	34	111	49	46	77	59	55	77						70		113
	34	18	48	99	41	41	43	92	107	135	63	56	66	67		65	73	109	83		72	76	76	69	75	64	121		96	42	68	131	36	115	55	51	78	58	64	75						74
	40	29	48	100	38	44	46	97	113	37	67	56	77	73		81	78		87		69	67	76	81	79	63			99	60	71	146	45	116	55	50	72	65	68	79						74
	46	31	48	103	46	55	53	100	130	46	60	52	82	74		85	80		87		77	73	81	78	83	68			31	58	67	31	48	116	58	56	81	69	65	85						78
	43	30	38	102	47	54	53	93	24	47	77	58	93	79		80	79		92		75	78	83	88	81	72			31	57	69	29	51	130	62	55	86	70	62	88						83
	57	43	51	107	52	61	49	97	32	42	82	63	99	87		76	86		103		72	82	91	87	87	75			56	56	74	37	57	134	61	60	92	59	59	88						70
	57	42	55	109	53	59	53	97	48	54	82	64	100	93		100	85		107		81	86	95	93	84	76			62	66	76	39	55	125	61	61	88	62	66	82						96
	57	40	54	112	54	60	63	44	54	57	89	65	105	82		99	97		115		81	90	99	83	91	73			57	62	83	46	60	35	65	57	85	72	69	95						113
	64	51	59	24	62	61	68	49	59	57	96	65	106	99			103		118		85	99		75	97	81			57	71	87	51	57	42	72	67	108	78	76	105						129
	70	55	66	43	62	65	65	47	52	59	96	70	110	110							86	102		98	99	71			67	68	85	57	63	47	78	72	120	76	73	102						132
	67	51	67	45	66	67	69	53	60	61		77	121	118							88	105		93	106	81			68	67	91	59	65	49	88	66	124	77	79	115
	74	61	62	51	66	65	73	52	61	64		82		122							97	100		98	106	87			63	71	91	55	70	54	91	72	136	82	82	120
	77	58	61	58	69	61	77	52	66	63		85		126							109	114		103	113	92			65	76	98	64	69	56	96	70	135	86	86	119
	78	59	74	62	69	66	71	62	70	73		86									114	109		90	118				70	81	96	61	74	59	103	77	146	88	89	124
	76	56	76	52	73	80	84	61	77	79		91										113		111	124				73	83	102	66	72	65	101	77	155	95	94	135
	86	65	74	54	76	77	87	60	72	80		91												115					79	88	102	71	78	62	133	83		102	114
	89	64	68	56	77	75	85	67	76	80		96												119					77	117	105	74	79	59	135	86		106	118
	89	66	72	66	82	82	94	66	83	86		97																	71	126	131	75	77	72		79		113	125
	93	72	79	69	82	86	87	75	87	88		86																	82			81	84	69		89		126	137
	94	69	84	66	83	87		79	90	93		101																	85			80	87	73		90		123	135
	107	76	90	59	91	87		80	82	90		98																	89			85	88	79		95		128	137
	126	78	90	62		84		77	91	100																			93			96	99	79		87		132
	130	79	95	61		93		83	96	108																			97			97	106	79		127
		82	90	71		94		90	103																				106			99	110	85		130
		86	97	75		94		92	98																				106			113	116	88		137
		89	92	74		98		94																					124			125	120	90		144
		91	88	67		103		106																									116	83
		97	106	71		106		92																									123	98
		103		65		97		100																									128	104
		111		77				93																										108
		114		83																														111
		107		83																														110
				88																														115
				83																														112
				88																														115
				97																														123
				99																														122
				113																														129
number of BarHL1+ cells per section																																		127
	52	61	57	67	50	58	48	59	54	52	39	50	40	42		37	38	31	38	24	43	44	37	46	44	42	31		55	47	47	55	58	68	46	55	44	51	50	44		26	26	28	23	39	28	30	29
average number per section per embryo	53.9167															37.9167													51.6667													29.0833
[truncated: 67 more columns]
