# Supplementary material for: Completion of neural crest cell production and emigration is regulated by retinoic-acid-dependent inhibition of BMP signaling
Source: eLife. 2022 Apr 8;11:e72723. doi: 10.7554/eLife.72723 (PMC8993216; doi:10.7554/eLife.72723)
Supplement: Figure 9—source data 1. [file elife-72723-fig9-data1.xlsx]

## Sheet: גיליון3
						AU						normalized to control mean
						control	foxd3	snai2	sox9			control	foxd3	snai2	sox9
					Raldh2 ISH intensity in dorsal NT	48.2279	38.994	50.8508	34.585			0.826527	0.668278	0.87148	0.592716
						61.94	46.642	32.2543	35.3147			1.06153	0.799349	0.552773	0.605223
						70.098	40.5655	30.555	41.4308			1.20134	0.69521	0.52365	0.710039
						58.2842	33.9754	35.615	40.1006			0.998873	0.582269	0.610368	0.687243
						49.3929	27.7206	38.01	29.6046			0.846493	0.475074	0.651414	0.507363
						64.2856	38.286	42.1287	38.275			1.10172	0.656144	0.721999	0.655955
						61.5986		41.073	40.505			1.05567		0.703907	0.694173
						53.0047		30.3617				0.908393		0.520337
						58.354	37.6972	37.6061	37.1165			1.00007	0.646054	0.644491	0.636102

## Sheet: Raw Data
control
54.81	66.57	78.03	57.79	69.1	63.01	60.53	49.8
47.1	64.27	61.07	60.96	61.44	65.82	64.58	65.6
48.69	64.51	70.45	58.55	52.78	72.51	58.68	34.65
42.87	60.48	68.72	56.22	53.26	61.94	59.32	52.33
48.53	61.23	66.46	59.42	54.67	65.8	57.77	47.28
45.77	46.95	75.83	59.79	39.11	64.35	55.82	61.15
53.26	63.06	67.88	54.22	30.6	69.25	62.4	46.76
51.18	64.88	65.11	51.38	28.28	63.97	61.56	42.05
47.96	62.44	57.37	60	57.12	66.17	67.46	48.03
49.84	63.2	63.77	68.34	60.36	62.92	55.86	33.3
42.72	67.13	66.58	62.66	54.21	49.9	59.34	44.07
43.27	64.77	75.03	54.32	38.13	51.89	62.97	56.35
45.28	59.49	81.27	77.43	34.26	62.58	70.05	54.19
53.91	59.17	75.71	60.33	58.18	70.85	66.04	69.99
	48.25	78.19	51.45		67.81		64.53
	57.52		57.99		69.8		66.65
	74.28		45.93				64.35
	66.72		62.18
			48.44
48.2279	61.94	70.098	58.2842	49.3929	64.2856	61.5986	53.0047
foxd3
35.67	49.17	39.38	37.12	17.11	43.83
57.34	39.1	30.38	26.96	18.07	37.95
48.31	49.75	43.54	20.63	22.08	35.62
24.3	43.07	44.79	32.79	20.07	38.65
21.81	35.2	27	29.29	17.77	40.43
45.16	48.3	38.41	42.75	19.14	31.52
22.52	40.58	32.68	40.47	19.27	37.66
22.6	28.38	42.48	38	19.15	37.49
21.47	50.25	39.23	30.9	18.72	31.78
40.75	51.93	39.96	27.39	16.06	44.35
35.76	51.48	29.33	35.68	19.58	33.52
29.86	46.57	39.38	42.68	37.59	34.34
49.41	41.58	36.68	37.02	49.73	39.76
35.47	60.66	38.71		49.49	41.67
31.46	63.61	49.94		32.96	45.72
41.28		50.72		38.15
57.96		43.57		56.31
25.26		46.53
23.42		46.22
22.4		52.38
28.33
46.99
53.8
46.56
46.05
42.74
38.69
70.33
51.76
52.36
38.994	46.642	40.5655	33.9754	27.7206	38.286
snai2
46.54	49.72	29.85	24.8	36.62	47.1	57.43	36.6
42.73	50.15	25.72	42.56	43.13	41.55	41.73	34.12
46.26	26.97	35.07	45.85	41.62	45.75	35.83	18.34
53.54	27.91	31.58	36.26	41.93	46.37	42.25	20.97
57.56	30.57		18.54	49.06	47.56	42	30.63
42.73	26.29		45.68	39.39	39.12	35.16	17.37
38.19	29.8			35.09	39.83	33.48	37.33
50.95	24.29			26.71	47.91	30.33	37.97
55.99	21.39			25.39	37.36	38.54	29.01
56.05	32.11			26.26	34.92	53.98	26.17
61.27	21.81			37.59	25.54		24.48
58.4	21.03			47.74	41.52		35.15
	21.98			41.84	48.49		35.48
	31.74			38.07	37.53		27.08
	20.72			33.37	51.38		32.95
	24.57			20.74			27.01
	21.59			46.84			36.11
	18.54			52.79			39.74
	18.74
	20.66
	22.93
	45.75
	44.74
	41.53
	29.67
	24.84
	70.64
	82.44
50.8508	32.2543	30.555	35.615	38.01	42.1287	41.073	30.3617
sox9
41.29	41.68	41.93	46.82	48.34	33.62	39.68
38.58	34.2	39.91	44.37	42.74	44.07	33.87
38.83	40.96	45.77	28.31	19.68	35.73	35.41
16.45	39.83	41.66	46.16	19.12	42.29	34.99
38.34	33.12	41.64	31.32	25.48	42.96	31.99
34.02	32.69	35.95	46.13	32.4	37.52	37.08
	26.32	35.71	36.15	25.84	33.96	39.71
	28.93	40.61	31.21	28.99	39.91	40.67
	35.68	47.79	39.01	29.43	41.09	36.38
	40.71	39.84	41.34	25.86	44.21	35.64
	35.19	44.78	38.36	26.13	34.53	34.34
	41.82	39.42	44.06	30.59	29.41	39.23
	22.7	43.59	32.01	30.26		30.06
	24.71		41.7			33.25
	29.54		49.99			47.55
	34.36		44.67			36.12
	41.86					50.03
	46.66					53.94
	40.02					49.82
						70.34
34.585	35.3147	41.4308	40.1006	29.6046	38.275	40.505
